# Supplementary material for: Cyclo-E5-bridged trinuclear triple-decker complexes (E = P, As) containing a triply-bonded Mo2 unit and their isomerisation
Source: Royal Society of Chemistry journal article supplement (doi:10.1039/d3cc03282e), 2023-01-01
Supplement: d3cc03282e1.pdf [file d3cc03282e1.pdf]

*Supporting information of the manuscript entitled:*

**Cyclo-E<sub>5</sub>-bridged Trinuclear Triple-decker Complexes (E = P, As)  
Containing a Triply-bonded Mo<sub>2</sub> Unit and Their Isomerisation**

Meng-Wei Lee, Gábor Balázs, Stephan Reichl, Lisa Zimmermann, Manfred Scheer\*

and Yi-Chou Tsai\*

**Contents**

|                                                                                                                                                                                                                                                                                                                                                     |    |
|-----------------------------------------------------------------------------------------------------------------------------------------------------------------------------------------------------------------------------------------------------------------------------------------------------------------------------------------------------|----|
| 1. List of figures .....                                                                                                                                                                                                                                                                                                                            | 2  |
| 2. List of tables .....                                                                                                                                                                                                                                                                                                                             | 2  |
| 3. Syntheses and characterisation of compounds.....                                                                                                                                                                                                                                                                                                 | 3  |
| 3-1. Cp*Fe( $\mu_3, \eta^{5:2:2}$ -P <sub>5</sub> )Mo <sub>2</sub> [ $\mu, \kappa^2$ -PhB(N-2,6- <sup>i</sup> Pr <sub>2</sub> C <sub>6</sub> H <sub>3</sub> ) <sub>2</sub> ] <sub>2</sub> ( <b>4</b> ) .....                                                                                                                                        | 4  |
| 3-2. Cp*Fe( $\mu_3, \eta^{5:2:2}$ -As <sub>5</sub> )Mo <sub>2</sub> [ $\mu, \kappa^2$ -PhB(N-2,6- <sup>i</sup> Pr <sub>2</sub> C <sub>6</sub> H <sub>3</sub> ) <sub>2</sub> ] <sub>2</sub> ( <b>5</b> ) .....                                                                                                                                       | 7  |
| 3-3. Cp*FeMo <sub>2</sub> [ $\kappa^2$ -PhB(N-2,6- <sup>i</sup> Pr <sub>2</sub> C <sub>6</sub> H <sub>3</sub> ) <sub>2</sub> ]( $\mu_3, \kappa: \kappa: \eta^2$ -P <sub>2</sub> )[ $\mu_3, \kappa: \kappa: \eta^3 \kappa$ -P <sub>3</sub> PhB(N-2,6- <sup>i</sup> Pr <sub>2</sub> C <sub>6</sub> H <sub>3</sub> ) <sub>2</sub> ] ( <b>6</b> ) ..... | 9  |
| 4. Details of crystallographic structure data and DFT calculations .....                                                                                                                                                                                                                                                                            | 15 |
| 4-1. Cartesian coordinates of the optimised <b>4</b> .....                                                                                                                                                                                                                                                                                          | 26 |
| 4-2. Cartesian coordinates of the optimised <b>5</b> .....                                                                                                                                                                                                                                                                                          | 31 |
| 4-3. Cartesian coordinates of the optimised <b>6</b> .....                                                                                                                                                                                                                                                                                          | 36 |
| 4-4. Cartesian coordinates of the calculated <b>6-TS</b> .....                                                                                                                                                                                                                                                                                      | 41 |
| 5. Reference.....                                                                                                                                                                                                                                                                                                                                   | 45 |

## 1. List of figures

|                  |                                                                                           |    |
|------------------|-------------------------------------------------------------------------------------------|----|
| <b>Fig. S1.</b>  | The $^1\text{H}$ NMR spectrum of <b>4</b> . .....                                         | 5  |
| <b>Fig. S2.</b>  | Thermolysis of <b>4</b> monitored by the $^1\text{H}$ NMR spectroscopy. ....              | 5  |
| <b>Fig. S3.</b>  | The $^{31}\text{P}$ NMR spectrum of <b>4</b> . .....                                      | 6  |
| <b>Fig. S4.</b>  | The $^{31}\text{P}\{^1\text{H}\}$ VT-NMR spectra of <b>4</b> . .....                      | 6  |
| <b>Fig. S5.</b>  | The $^{31}\text{P}\{^1\text{H}\}$ VT-NMR spectra of mixture <b>4</b> and <b>6</b> . ..... | 7  |
| <b>Fig. S6.</b>  | The $^1\text{H}$ NMR spectrum of <b>5</b> . .....                                         | 8  |
| <b>Fig. S7.</b>  | Thermolysis of <b>5</b> monitored by the $^1\text{H}$ NMR spectroscopy. ....              | 9  |
| <b>Fig. S8.</b>  | The $^1\text{H}$ NMR spectrum of <b>6</b> . .....                                         | 11 |
| <b>Fig. S9.</b>  | The $^{13}\text{C}\{^1\text{H}\}$ NMR spectrum of <b>6</b> . .....                        | 11 |
| <b>Fig. S10.</b> | The $^{31}\text{P}$ NMR spectrum of <b>6</b> . .....                                      | 12 |
| <b>Fig. S11.</b> | The experimental and simulated $^{31}\text{P}$ NMR spectra of <b>6</b> . .....            | 12 |
| <b>Fig. S12.</b> | The $^{31}\text{P}\{^1\text{H}\}$ VT-NMR spectra of <b>6</b> . .....                      | 13 |
| <b>Fig. S13.</b> | The $^{31}\text{P}$ - $^{31}\text{P}$ INADEQUATE spectrum of <b>6</b> . .....             | 14 |
| <b>Fig. S14.</b> | The $^{31}\text{P}$ - $^{31}\text{P}$ COSY spectrum of <b>6</b> . .....                   | 14 |
| <b>Fig. S15.</b> | The solid-state molecular structure of <b>4</b> . .....                                   | 17 |
| <b>Fig. S16.</b> | The solid-state molecular structure of <b>5</b> . .....                                   | 18 |
| <b>Fig. S17.</b> | The solid-state molecular structure of <b>6</b> . .....                                   | 20 |
| <b>Fig. S18.</b> | Selected Intrinsic Bonding Orbitals of <b>4</b> . .....                                   | 23 |
| <b>Fig. S19.</b> | Selected Intrinsic Bonding Orbitals of <b>5</b> . .....                                   | 23 |
| <b>Fig. S20.</b> | Selected Intrinsic Bonding Orbitals of <b>6</b> . .....                                   | 24 |
| <b>Fig. S21.</b> | The DFT-optimised transition state structure of <b>6-TS</b> . .....                       | 25 |

## 2. List of tables

|                  |                                                                                                                                                                                  |    |
|------------------|----------------------------------------------------------------------------------------------------------------------------------------------------------------------------------|----|
| <b>Table S1.</b> | Chemical shifts, coupling constants, and linewidth data obtained from simulation of the $^{31}\text{P}$ NMR spectrum of <b>6</b> . .....                                         | 13 |
| <b>Table S2.</b> | Crystallographic data for compound <b>4-6</b> . .....                                                                                                                            | 16 |
| <b>Table S1.</b> | Selected bond lengths ( $\text{\AA}$ ) and angles ( $^\circ$ ) of <b>4</b> and <b>5</b> . .....                                                                                  | 19 |
| <b>Table S2.</b> | Selected bond lengths ( $\text{\AA}$ ) and angles ( $^\circ$ ) of the experimental, optimised structures of <b>6</b> , and the transition state structure of <b>6-TS</b> . ..... | 21 |
| <b>Table S3.</b> | The calculated Mayer bond orders (MBOs) of <b>4-6</b> . .....                                                                                                                    | 22 |

### 3. Syntheses and characterisation of compounds

Unless stated otherwise, all operations were performed at room temperature, using standard Schlenk techniques or in a glovebox under an inert atmosphere of nitrogen. Et<sub>2</sub>O and THF were distilled from purple sodium benzophenone ketyl. *n*-Hexane, toluene and dichloromethane were passed through columns of solvent purification systems to remove oxygen and moisture. All deuterated solvents were purchased in ampoules from Sigma-Aldrich and stored over 3 Å molecular sieves in Schlenk tubes. 3 Å molecular sieves and celite were dried in a vacuum for 3 days at a temperature just above 170 °C. Mo<sub>2</sub>[ $\mu, \kappa^2$ -PhB(N-2,6-*i*Pr<sub>2</sub>C<sub>6</sub>H<sub>3</sub>)<sub>2</sub>]<sub>2</sub> (**1**)<sup>1</sup> and Cp\*Fe( $\eta^5$ -E<sub>5</sub>) (E = P (**2**),<sup>2</sup> As (**3**))<sup>3</sup> was synthesized based on literature methods. All other commercially available chemicals were used without further purification. Elemental analyses were performed with the Elementar vario EL cube. NMR spectra were recorded with Bruker Avance 400 NMR spectrometer or Bruker Avance 500 NMR spectrometer and graphed by the Bruker TopSpin 3.6.2 program. The spectra are referenced relative to residual protio-solvent resonances.<sup>4</sup> Because commonly-utilized solvents were frequently used in the glove box for experimental operations, the deuterated solvents stored in the glovebox were inevitably contaminated with trace solvent vapors. The NMR resonances of common solvents were ignored for clarity when labeling the NMR spectral signals in each deuterated solvent matrix.<sup>4</sup>

### 3-1. $\text{Cp}^*\text{Fe}(\mu_3, \eta^{5:2:2}\text{-P}_5)\text{Mo}_2[\mu, \kappa^2\text{-PhB}(\text{N-2,6-}i\text{Pr}_2\text{C}_6\text{H}_3)_2]_2$ (**4**)

To a 20 mL of vial was charged with **1** (105.9 mg, 0.099 mmol) and **2** (34.3 mg, 0.099 mmol). 4 mL of  $\text{Et}_2\text{O}$  of  $-30\text{ }^\circ\text{C}$  was then added to the vial and the resultant solution was allowed to react at ambient temperature for 30 min by stirring. The color of the solution changed from burgundy to deep brown along with the emersion of a deep brown precipitate. After the reaction went to completion, all volatile materials were removed under vacuum. The residual solid was washed with  $\text{Et}_2\text{O}$  of  $-30\text{ }^\circ\text{C}$  and was collected in a vial. A saturated dichloromethane solution of the collected brown solid was layered with *n*-hexane for liquid/liquid diffusion, by which deep brown crystals of **4** were isolated (89.7 mg, 0.063 mmol). The isolated yield was 64.0%. Anal. Calcd for  $\text{C}_{70}\text{H}_{93}\text{B}_2\text{FeMo}_2\text{N}_4\text{P}_5$ : C, 59.43; H, 6.63; N, 3.96%. Found: C, 59.92; H, 7.27; N, 4.31%.  $^1\text{H}$  NMR (400.2 MHz, 300.0 K, toluene- $d_8$ ):  $\delta$  7.52 (m, 2 H, *PhB*(N-2,6- $i\text{Pr}_2\text{C}_6\text{H}_3)_2$ ), 7.20-7.12 (m, 6 H, *PhB*(N-2,6- $i\text{Pr}_2\text{C}_6\text{H}_3)_2$ ), 6.91-6.70 (m, 14 H, *PhB*(N-2,6- $i\text{Pr}_2\text{C}_6\text{H}_3)_2$ ), 4.44 (sept, 2 H, *CHMe*<sub>2</sub>), 4.07 (sept, 2 H, *CHMe*<sub>2</sub>), 3.52 (sept, 2 H, *CHMe*<sub>2</sub>), 1.85 (sept, 2 H, *CHMe*<sub>2</sub>), 1.66 (d, 6 H, *CHMe*<sub>2</sub>), 1.62 (d, 6 H, *CHMe*<sub>2</sub>), 1.53 (m, 12 H, two *CHMe*<sub>2</sub> overlapped), 1.17(s, 15 H, *Cp*<sup>\*</sup>), 0.94 (d, 6 H, *CHMe*<sub>2</sub>), 0.44 (m, 12 H, two *CHMe*<sub>2</sub> overlapped), 0.21 (d, 6 H, *CHMe*<sub>2</sub>) ppm.  $^{31}\text{P}$  NMR (162.0 MHz, 298.0 K, THF- $d_8$ ):  $\delta$  25.2 ppm.

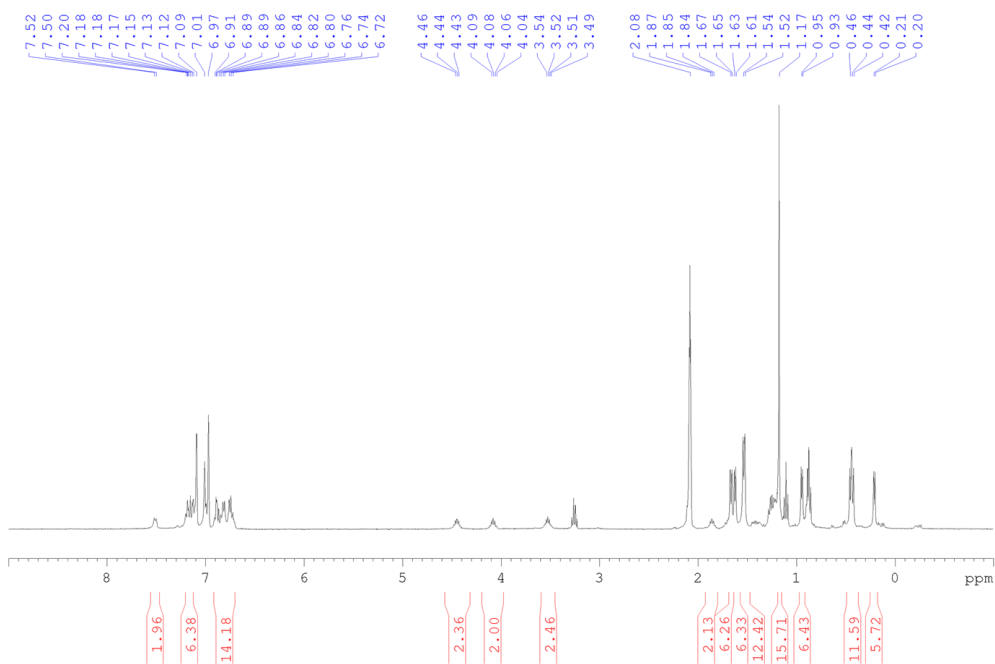

**Fig. S1.** The  $^1\text{H}$  NMR spectrum of **4**.

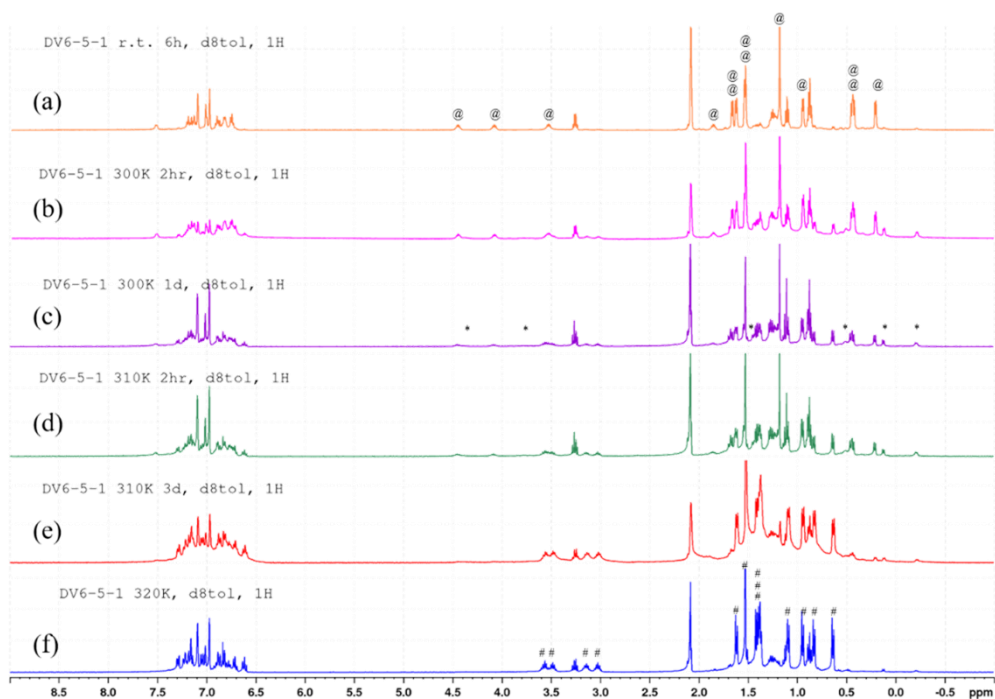

**Fig. S2.** Thermolysis of **4** monitored by the  $^1\text{H}$  NMR (400.2 MHz, 300.0 K, toluene- $d_8$ ) spectroscopy. The experimental conditions were: (a) 15 °C; (b) 27 °C for 2 hours; (c) 27 °C for 1 day; (d) 37 °C for 2 hours; (e) 37 °C for 3 days; (f) 47 °C for 1 day. Signals marked with @ are assigned to **4**, and signals marked with \* are assigned to unknown intermediates, and signals marked with # are assigned to **6**.

David, DV6-5t, d8THF, 31P  
rau\_sP31\_GS\_64 THF (C:\Bruker\TopSpin3.5pl7) AK\_Scheer 23

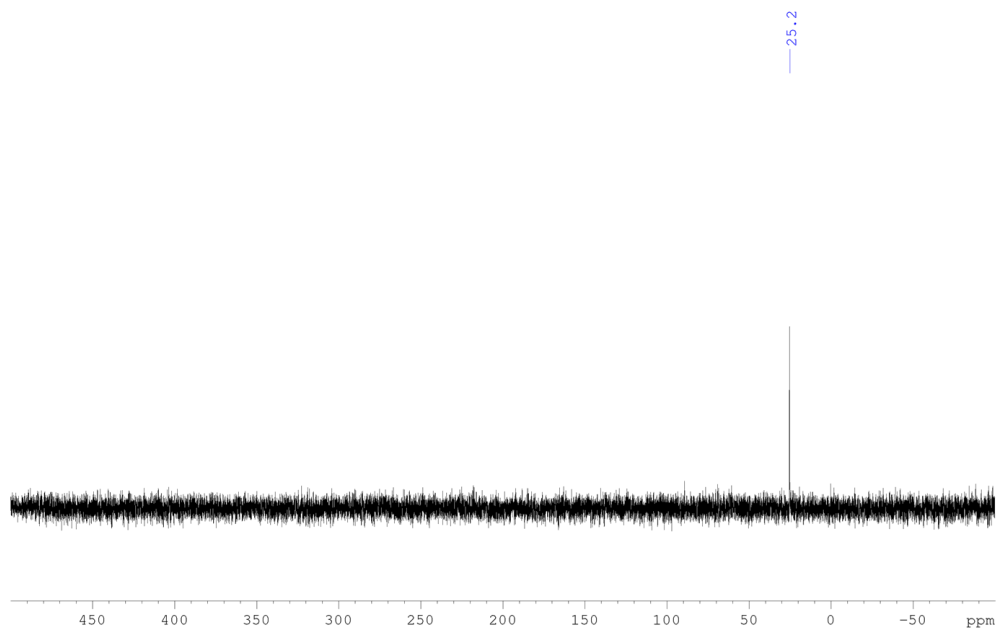

**Fig. S3.** The  $^{31}\text{P}$  NMR spectrum of **4**.

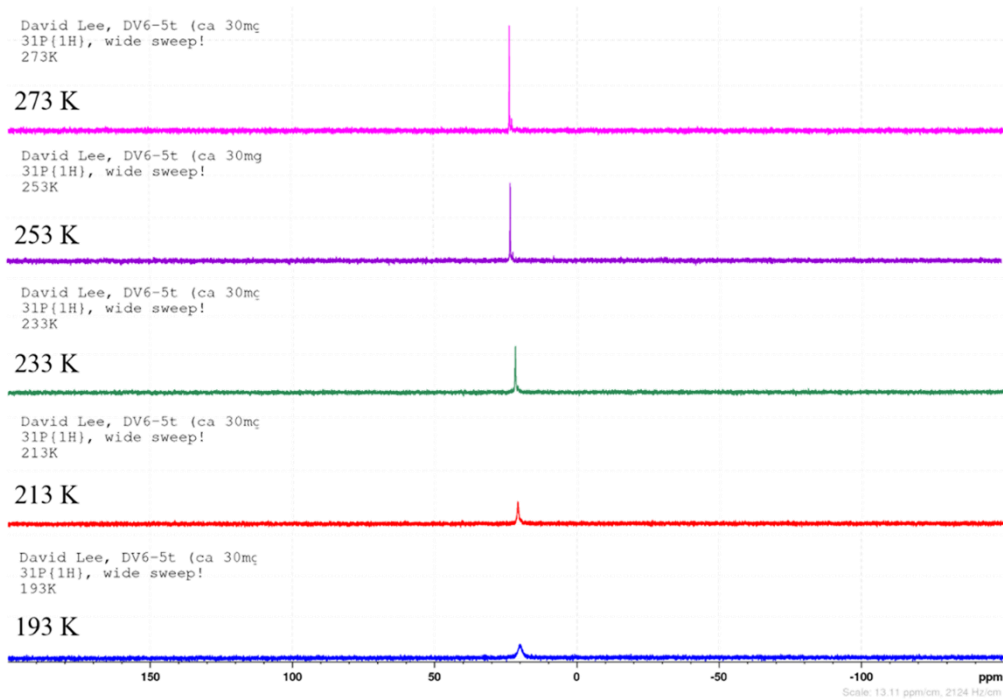

**Fig. S4.** The  $^{31}\text{P}\{^1\text{H}\}$  VT-NMR (162.0 MHz, 273-193 K, toluene- $d_8$ ) spectra of **4**.

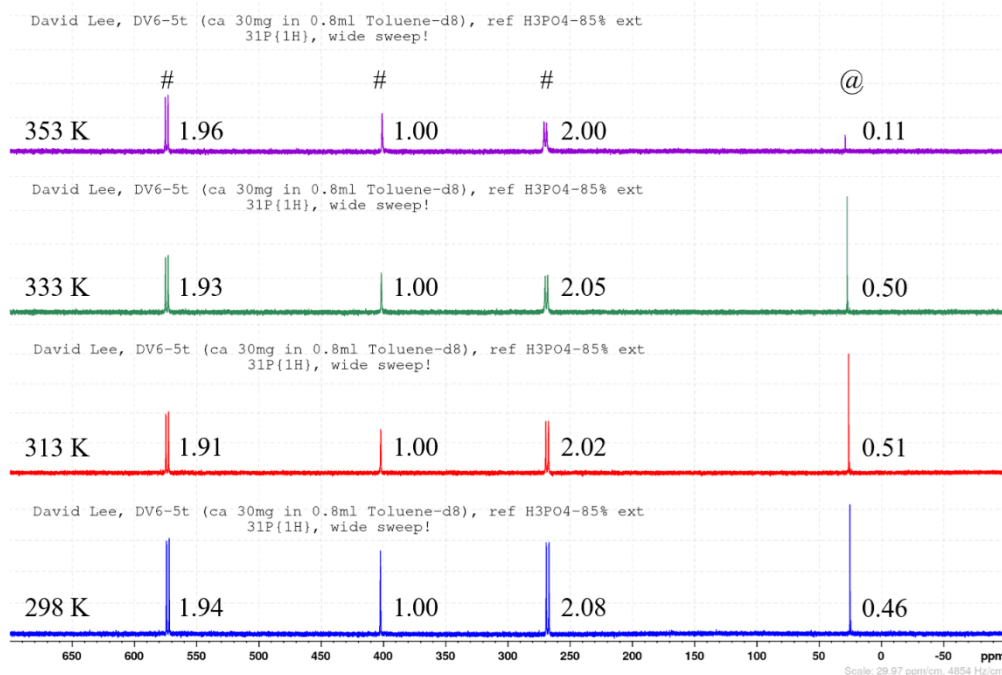

**Fig. S5.** The  $^{31}\text{P}\{^1\text{H}\}$  VT-NMR (162.0 MHz, 298-353 K, toluene- $d_8$ ) spectra of mixture **4** and **6**. Signals marked with @ are assigned to **4**, and signals marked with # are assigned to **6**. The integral ratio is marked next to each signal.

### 3-2. $\text{Cp}^*\text{Fe}(\mu_3, \eta^{5:2:2}\text{-As}_5)\text{Mo}_2[\mu, \kappa^2\text{-PhB}(\text{N-2,6-}i\text{Pr}_2\text{C}_6\text{H}_3)_2]_2$ (**5**)

To a 100 mL of Schlenk tube was charged with **1** (276.2 mg, 0.258 mmol), **3** (146.2 mg, 0.258 mmol), and 10 mL Et<sub>2</sub>O. The resultant mixture was allowed to react at ambient temperature for 4 hours by stirring. The color of the solution changed from burgundy to deep brown along with the emersion of a deep brown precipitate. After the reaction went to completion, all volatile materials were removed under vacuum. The residual solid was washed with *n*-hexane, and was then dissolved in THF. A saturated THF solution was layered with *n*-hexane for liquid/liquid diffusion, by which deep

brown crystals of **5** were collected (253.3 mg, 0.155 mmol). The isolated yield was 60.0%. Anal. Calcd for  $C_{70}H_{93}As_5B_2FeMo_2N_4$ : C, 51.44; H, 5.74; N, 3.43%. Found: C, 51.61; H, 5.70; N, 3.27%.  $^1H$  NMR (400.3 MHz, 298.0 K, toluene- $d_8$ ):  $\delta$  7.55 (br, 2 H, *PhB(N-2,6-<sup>i</sup>Pr<sub>2</sub>C<sub>6</sub>H<sub>3</sub>)<sub>2</sub>*), 7.29-7.11 (m, 7 H, *PhB(N-2,6-<sup>i</sup>Pr<sub>2</sub>C<sub>6</sub>H<sub>3</sub>)<sub>2</sub>*), 6.97-6.75 (m, 13 H, *PhB(N-2,6-<sup>i</sup>Pr<sub>2</sub>C<sub>6</sub>H<sub>3</sub>)<sub>2</sub>*), 4.64 (sept, 2 H, *CHMe<sub>2</sub>*), 3.92 (sept, 2 H, *CHMe<sub>2</sub>*), 3.57 (sept, 2 H, *CHMe<sub>2</sub>*), 1.90 (sept, 2 H, *CHMe<sub>2</sub>*), 1.70 (d, 6 H, *CHMe<sub>2</sub>*), 1.67 (d, 6 H, *CHMe<sub>2</sub>*), 1.56 (d, 6 H, *CHMe<sub>2</sub>*), 1.46 (d, 6 H, *CHMe<sub>2</sub>*), 1.14 (s, 15 H, *Cp\**), 0.95 (d, 6 H, *CHMe<sub>2</sub>*), 0.57 (d, 6 H, *CHMe<sub>2</sub>*), 0.39 (d, 6 H, *CHMe<sub>2</sub>*), 0.17 (d, 6 H, *CHMe<sub>2</sub>*) ppm.

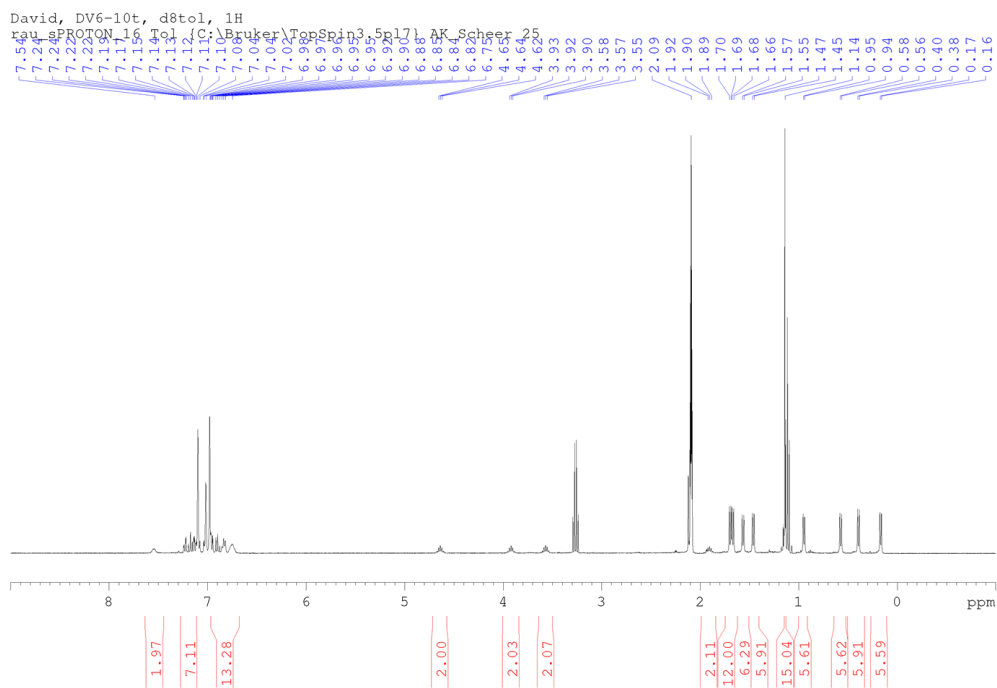

**Fig. S6.** The  $^1H$  NMR spectrum of **5**.



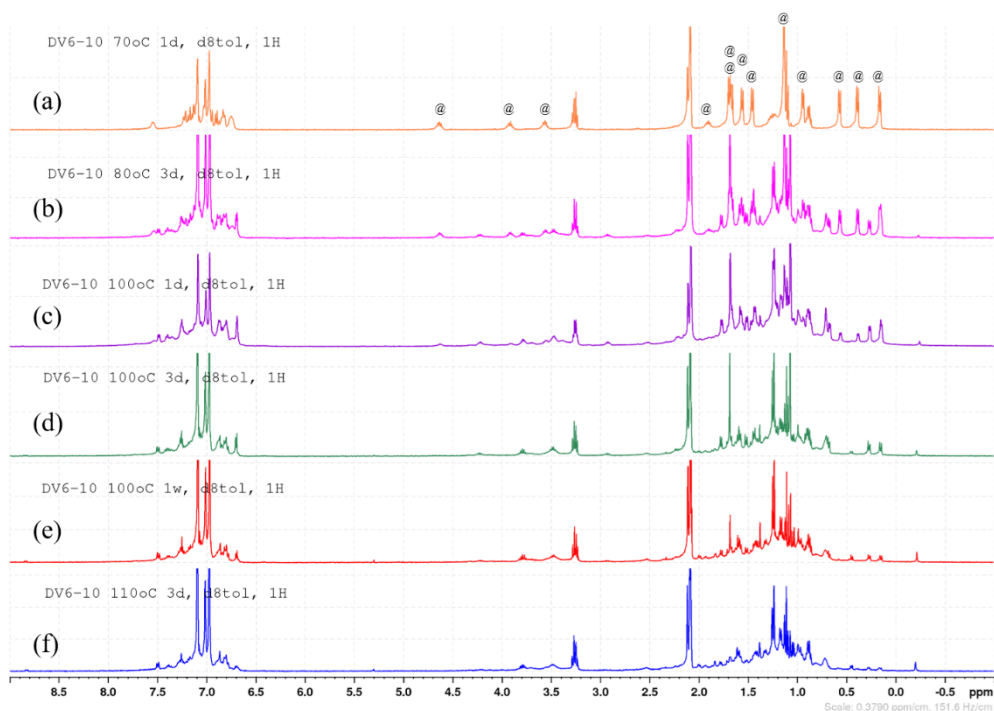

**Fig. S7.** Thermolysis of **5** monitored by the  $^1\text{H}$  NMR (400.3 MHz, 298.0 K, toluene- $d_8$ ) spectroscopy. The experimental conditions were: (a) 70 °C for 1 day; (b) 80 °C for 3 days; (c) 100 °C for 1 day; (d) 100 °C for 3 days; (e) 100 °C for 7 days; (f) 110 °C for 1 day. Signals marked with @ are assigned to **5**.

### 3-3. $\text{Cp}^*\text{FeMo}_2[\kappa^2\text{-PhB(N-2,6-}i\text{Pr}_2\text{C}_6\text{H}_3)_2](\mu_3,\kappa:\kappa\text{-}\eta^2\text{-P}_2)[\mu_3,\kappa:\kappa\text{-}\eta^3\kappa\text{-P}_3\text{PhB(N-2,6-}i\text{Pr}_2\text{C}_6\text{H}_3)_2]$ (**6**)

To a 100 mL of Schlenk tube was charged with **4** (79.2 mg, 0.056 mmol) and 10 mL toluene. The resultant solution was allowed to react at 57 °C for 1 day by stirring. After the reaction went to completion, all volatile materials were removed under vacuum. The solid residual was washed with *n*-hexane and extracted with  $\text{Et}_2\text{O}$ . The filtrate was vaporized for recrystallization, by which deep brown crystals of **6** were isolated (69.8 mg, 0.049 mmol). The isolated yield was 87.5%. Anal. Calcd for

C<sub>70</sub>H<sub>93</sub>B<sub>2</sub>FeMo<sub>2</sub>N<sub>4</sub>P<sub>5</sub>: C, 59.43; H, 6.63; N, 3.96%. Found: C, 59.81; H, 6.91; N, 3.81%.

<sup>1</sup>H NMR (400.2 MHz, 300.0 K, toluene-*d*<sub>8</sub>): δ 7.27-6.97 (m, 12 H, *PhB*(N-2,6-*i*Pr<sub>2</sub>C<sub>6</sub>H<sub>3</sub>)<sub>2</sub>), 6.85-6.76 (m, 6 H, *PhB*(N-2,6-*i*Pr<sub>2</sub>C<sub>6</sub>H<sub>3</sub>)<sub>2</sub>), 6.68 (t, 2 H, *PhB*(N-2,6-*i*Pr<sub>2</sub>C<sub>6</sub>H<sub>3</sub>)<sub>2</sub>), 6.61 (the , 2 H, *PhB*(N-2,6-*i*Pr<sub>2</sub>C<sub>6</sub>H<sub>3</sub>)<sub>2</sub>), 3.54 (sept, 2 H, CHMe<sub>2</sub>), 3.46 (sept, 2 H, CHMe<sub>2</sub>), 3.12 (sept, 2 H, CHMe<sub>2</sub>), 3.00 (sept, 2 H, CHMe<sub>2</sub>), 1.59 (d, 6 H, CHMe<sub>2</sub>), 1.52 (s, 15 H, Cp\*), 1.39 (d, 6 H, CHMe<sub>2</sub>), 1.37 (d, 6 H, CHMe<sub>2</sub>), 1.35 (d, 6 H, CHMe<sub>2</sub>), 1.06 (d, 6 H, CHMe<sub>2</sub>), 0.92 (d, 6 H, CHMe<sub>2</sub>), 0.80 (d, 6 H, CHMe<sub>2</sub>), 0.62 (d, 6 H, CHMe<sub>2</sub>) ppm. <sup>13</sup>C {<sup>1</sup>H} NMR (100.6 MHz, 300.0 K, toluene-*d*<sub>8</sub>): δ 162.0, 150.7, 145.8, 141.2, 140.9, 136.7, 130.4, 130.2, 129.4, 127.9, 127.2, 126.4, 126.1, 126.0, 124.6, 123.8, 122.7 (*PhB*(N-2,6-*i*Pr<sub>2</sub>C<sub>6</sub>H<sub>3</sub>)<sub>2</sub>), 98.2 (Cp\*), 29.7, 29.6, 29.1, 29.1, 27.7, 26.8, 25.6, 25.0, 24.5, 24.2, 24.1, 23.4 (CHMe<sub>2</sub>), 12.4 (Cp\*) ppm. <sup>31</sup>P NMR (202.5 MHz, 300.0 K, toluene-*d*<sub>8</sub>): δ 572.5 (dddd), 401.6 (dddd), 267.3 (dddd) ppm. The coupling constants were listed in Table S1.

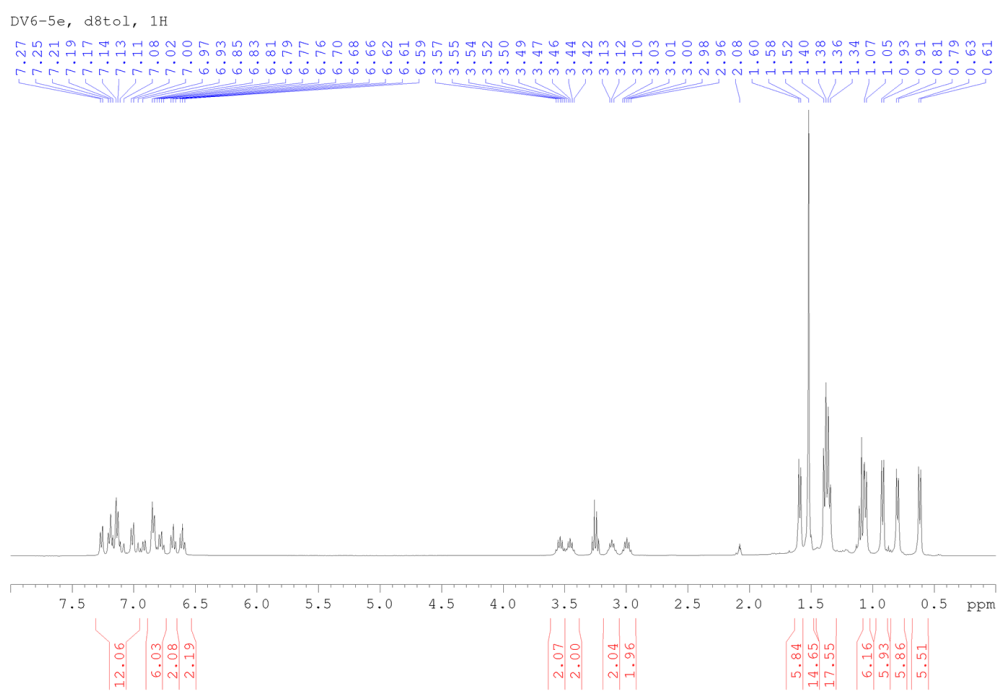

**Fig. S8.** The  $^1\text{H}$  NMR spectrum of **6**.

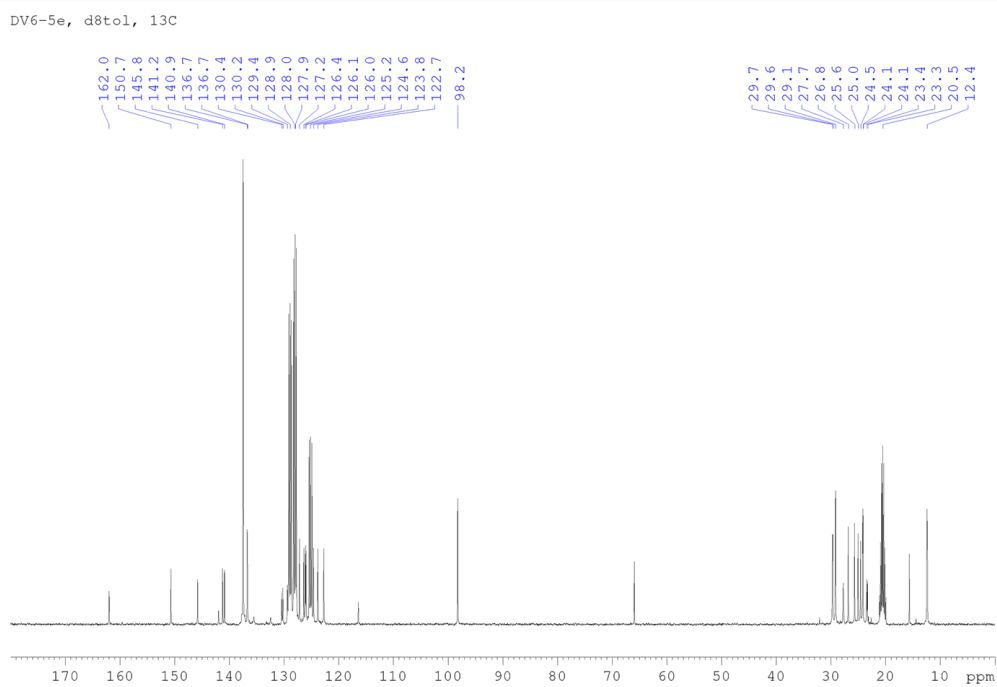

**Fig. S9.** The  $^{13}\text{C}\{^1\text{H}\}$  NMR spectrum of **6**.

DV 6-5

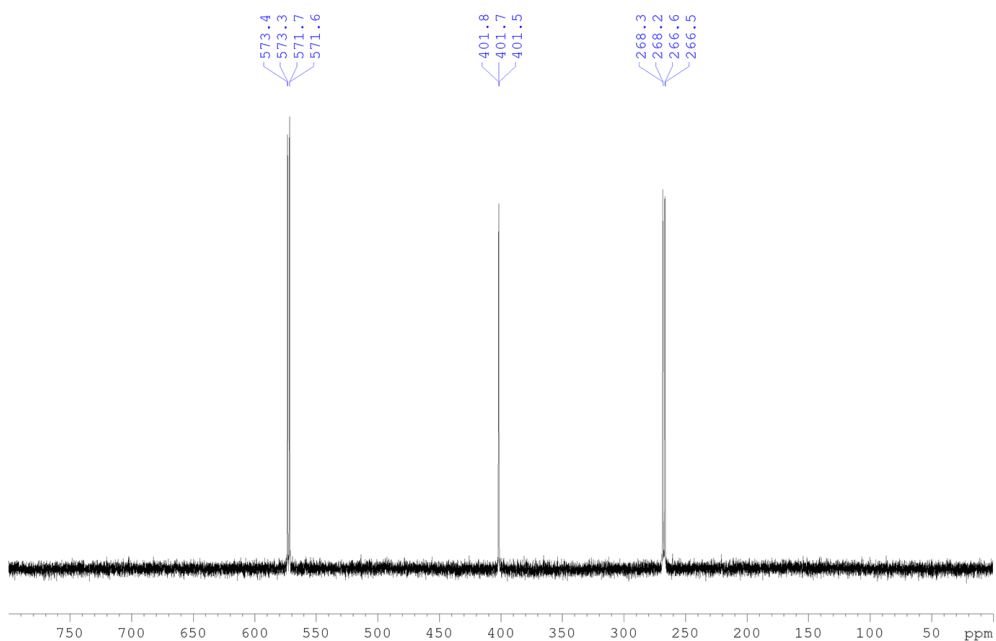

**Fig. S10.** The  $^{31}\text{P}$  NMR spectrum of **6**.

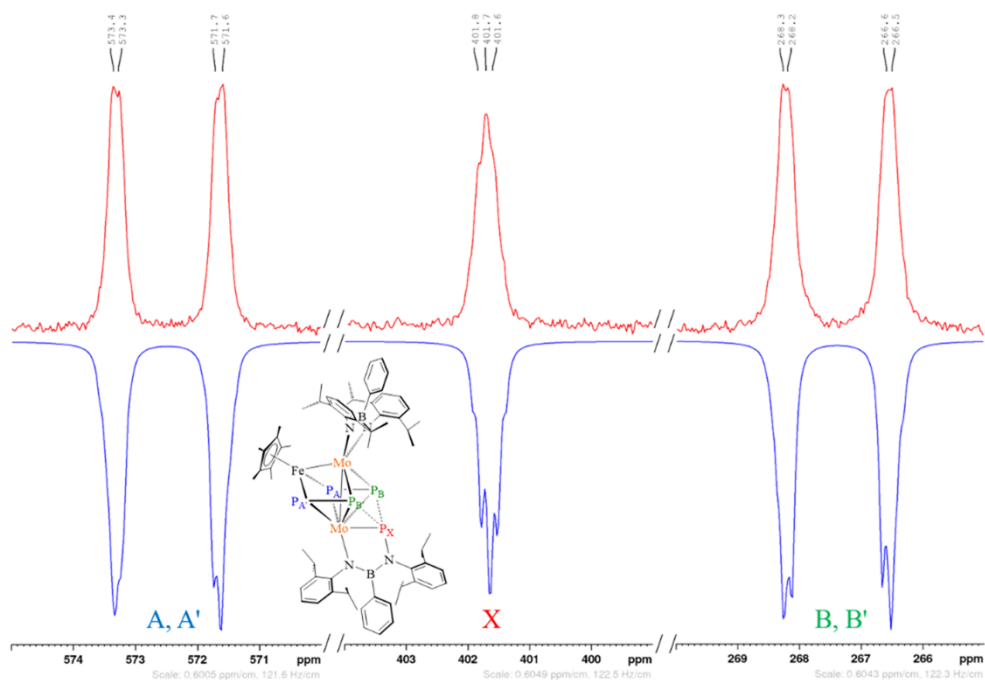

**Fig. S11.** The experimental (top) and simulated (bottom)  $^{31}\text{P}$  NMR spectra of **6**.

**Table S1.** Chemical shifts, coupling constants, and linewidth data obtained from simulation of the  $^{31}\text{P}$  NMR spectrum of **6**.

| $\delta$ (ppm)                                                       |       | $J$ (Hz)            |       |                    |       |
|----------------------------------------------------------------------|-------|---------------------|-------|--------------------|-------|
| P <sub>A</sub>                                                       | 572.4 | $^1J_{\text{AB}}$   | 340.9 | $^2J_{\text{BA}'}$ | -20.8 |
| P <sub>B</sub>                                                       | 267.3 | $^1J_{\text{A'B}'}$ | 341.8 | $^2J_{\text{XA}'}$ | 24.2  |
| P <sub>X</sub>                                                       | 401.6 | $^2J_{\text{AX}}$   | 25.0  | $^2J_{\text{AB}'}$ | -19.3 |
| P <sub>A'</sub>                                                      | 572.5 | $^2J_{\text{BX}}$   | -31.5 | $^2J_{\text{BB}'}$ | 14.6  |
| P <sub>B'</sub>                                                      | 267.3 | $^2J_{\text{AA}'}$  | 28.5  | $^2J_{\text{XB}'}$ | -26.8 |
| * Simulations were performed using the Bruker TopSpin 3.6.2 program. |       |                     |       | Linewidth          | 20.0  |

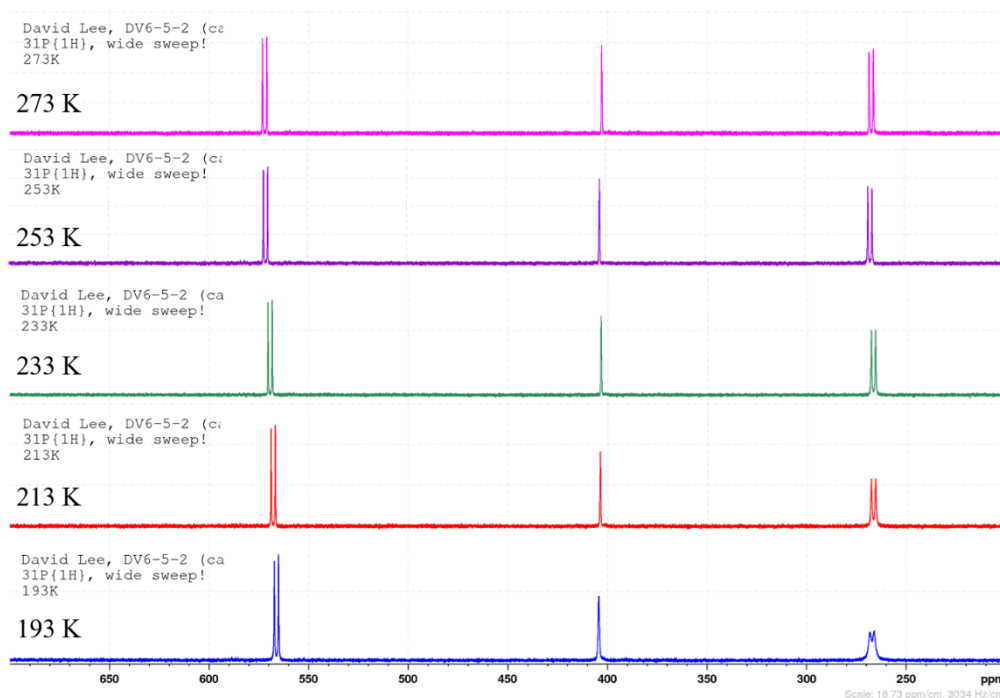

**Fig. S12.** The  $^{31}\text{P}\{^1\text{H}\}$  VT-NMR (162.0 MHz, 273-193 K, toluene- $d_8$ ) spectra of **6**.

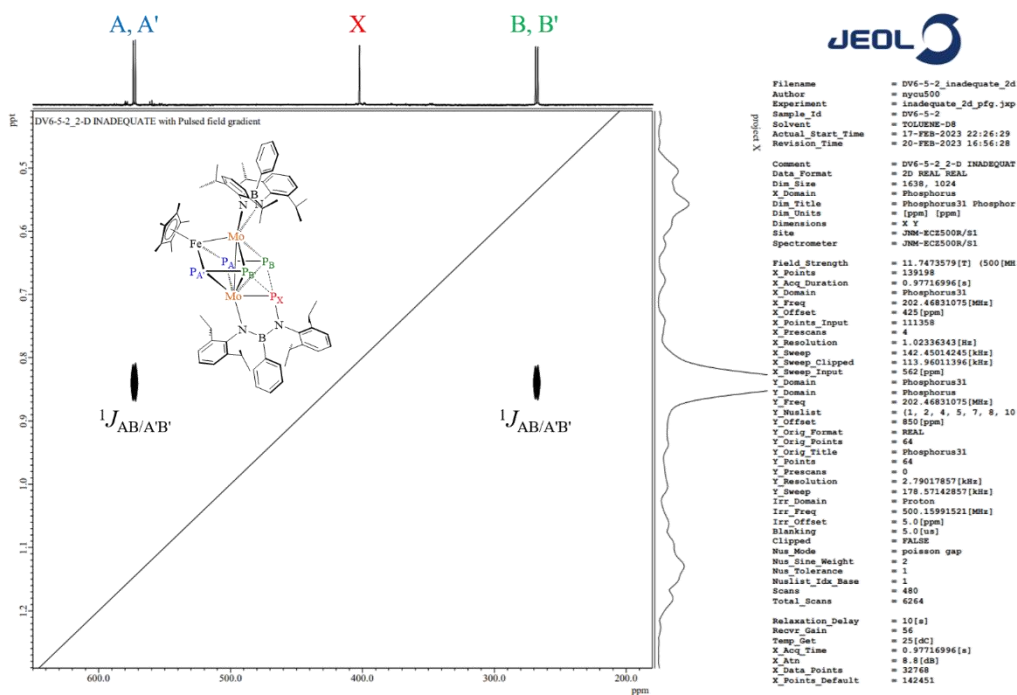

**Fig. S13.** The  $^{31}\text{P}$ - $^{31}\text{P}$  INADEQUATE (202.5 MHz, 298.2 K, toluene- $d_8$ ) spectrum of **6**.

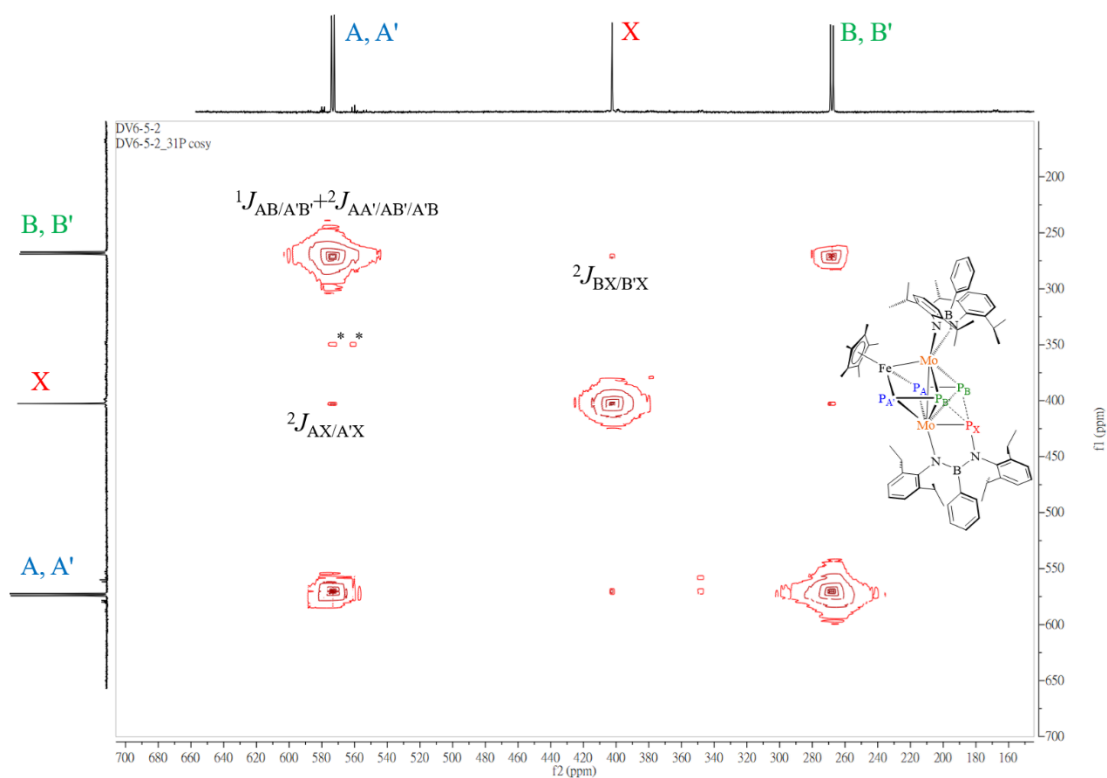

**Fig. S14.** The  $^{31}\text{P}$ - $^{31}\text{P}$  COSY (202.5 MHz, 298.2 K, toluene- $d_8$ ) spectrum of **6**. \*Signals from impurities.

#### 4. Details of crystallographic structure data and DFT calculations

Single crystals data of **4** and **5** were collected on a GV1000, TitanS2 diffractometer, and those of **6** were collected on an XtaLAB Synergy R, DW system, HyPix-Arc 150 diffractometer. Using Olex2<sup>5</sup>, the structure was solved with the SHELXT<sup>6</sup> structure solution program using Intrinsic Phasing and refined with the SHELXL<sup>7</sup> refinement package using Least Squares minimization. Images of crystallographic structures were illustrated by the Diamond 3.2 program.

All calculations were performed with the ORCA 5.0 program.<sup>8</sup> The geometry was optimised starting from the X-ray coordinates at the BP86<sup>9-11</sup>/def2-SVP<sup>12,13</sup> level, followed by single point calculation using the def2-TZVP<sup>12,13</sup> basis set for Mo, P, N, B, carbon atoms bonded to Mo and the C atom of the N<sub>2</sub>CH unit. Dispersion correction was included via the Grimme's D4 model.<sup>14,15</sup> The NBO analysis was performed with NBO 7.0.<sup>16</sup> The Intrinsic Bonding Orbitals<sup>17</sup> were calculated as implemented in ORCA and visualized using ChemCraft.

**Table S2.** Crystallographic data for compound **4-6**.

| Compound                                            | <b>4</b> · 2 CH <sub>2</sub> Cl <sub>2</sub>                                                                   | <b>5</b> · 1.3 C <sub>4</sub> H <sub>8</sub> O                                                                                           | <b>6</b> · Et <sub>2</sub> O                                                                     |
|-----------------------------------------------------|----------------------------------------------------------------------------------------------------------------|------------------------------------------------------------------------------------------------------------------------------------------|--------------------------------------------------------------------------------------------------|
| Identification code                                 | abs_gaus_error                                                                                                 | res462_cub2_twin1_hklf4                                                                                                                  | 230119lt_auto                                                                                    |
| Empirical formula                                   | C <sub>72</sub> H <sub>97</sub> B <sub>2</sub> Cl <sub>4</sub> FeMo <sub>2</sub> N <sub>4</sub> P <sub>5</sub> | C <sub>70</sub> H <sub>93</sub> B <sub>2</sub> FeMo <sub>2</sub> N <sub>4</sub> As <sub>5</sub> · 1.3<br>C <sub>4</sub> H <sub>8</sub> O | C <sub>74</sub> H <sub>103</sub> B <sub>2</sub> FeMo <sub>2</sub> N <sub>4</sub> OP <sub>5</sub> |
| Formula weight                                      | 1584.53                                                                                                        | 1728.16                                                                                                                                  | 1488.80                                                                                          |
| Temperature (K)                                     | 89.9(4)                                                                                                        | 123.00(10)                                                                                                                               | 100.00(10)                                                                                       |
| Crystal system                                      | triclinic                                                                                                      | monoclinic                                                                                                                               | monoclinic                                                                                       |
| Space group                                         | P-1                                                                                                            | C2/c                                                                                                                                     | P2 <sub>1</sub> /c                                                                               |
| a (Å)                                               | 12.7702(3)                                                                                                     | 23.4267(2)                                                                                                                               | 11.1538(1)                                                                                       |
| b (Å)                                               | 13.1154(3)                                                                                                     | 12.7561(1)                                                                                                                               | 17.6318(2)                                                                                       |
| c (Å)                                               | 24.2746(4)                                                                                                     | 48.9677(5)                                                                                                                               | 37.3554(4)                                                                                       |
| α (°)                                               | 90.203(2)                                                                                                      | 90                                                                                                                                       | 90                                                                                               |
| β (°)                                               | 90.567(2)                                                                                                      | 93.741(1)                                                                                                                                | 90.889(1)                                                                                        |
| γ (°)                                               | 117.810(2)                                                                                                     | 90                                                                                                                                       | 90                                                                                               |
| Volume (Å <sup>3</sup> )                            | 3595.75(14)                                                                                                    | 14602.0(2)                                                                                                                               | 7345.49(13)                                                                                      |
| Z                                                   | 2                                                                                                              | 8                                                                                                                                        | 4                                                                                                |
| ρ <sub>calc</sub> (g/cm <sup>3</sup> )              | 1.463                                                                                                          | 1.572                                                                                                                                    | 1.346                                                                                            |
| μ (mm <sup>-1</sup> )                               | 7.168                                                                                                          | 5.376                                                                                                                                    | 5.685                                                                                            |
| F(000)                                              | 1640.0                                                                                                         | 7024                                                                                                                                     | 3112.0                                                                                           |
| Crystal size (mm <sup>3</sup> )                     | 0.317 × 0.059 × 0.033                                                                                          | 0.16 × 0.09 × 0.04 × 0.05                                                                                                                | 0.17 × 0.16 × 0.12                                                                               |
| Radiation λ (Å)                                     | 1.54184 (Cu Kα)                                                                                                | 1.39222 (Cu Kβ)                                                                                                                          | 1.54184 (Cu Kα)                                                                                  |
| 2θ range for data collection (°)                    | 7.284 to 148.638                                                                                               | 7.376 to 135.440                                                                                                                         | 4.732 to 134.158                                                                                 |
| Index ranges                                        | -15 ≤ h ≤ 13<br>-10 ≤ k ≤ 16<br>-29 ≤ l ≤ 29                                                                   | -30 ≤ h ≤ 29<br>-10 ≤ k ≤ 16<br>-64 ≤ l ≤ 64                                                                                             | -13 ≤ h ≤ 9<br>-21 ≤ k ≤ 21<br>-42 ≤ l ≤ 44                                                      |
| Reflections collected                               | 25909                                                                                                          | 34483                                                                                                                                    | 65913                                                                                            |
| Independent reflections, R(int)                     | 13807, 0.0306                                                                                                  | 32515, 0.0518                                                                                                                            | 13043, 0.0295                                                                                    |
| Data/restraints/parameters                          | 13807/0/832                                                                                                    | 32515/0/824                                                                                                                              | 13043/381/921                                                                                    |
| Goodness-of-fit on F <sup>2</sup>                   | 1.021                                                                                                          | 0.961                                                                                                                                    | 1.019                                                                                            |
| Final R <sub>1</sub> , wR <sub>2</sub> [I ≥ 2σ (I)] | 0.0349, 0.0912                                                                                                 | 0.0385, 0.1002                                                                                                                           | 0.0268, 0.0701                                                                                   |
| Final R <sub>1</sub> , wR <sub>2</sub> [all data]   | 0.0423, 0.0932                                                                                                 | 0.0467, 0.1026                                                                                                                           | 0.0285, 0.0710                                                                                   |
| Largest diff. peak/hole (e · Å <sup>-3</sup> )      | 1.00/-1.03                                                                                                     | 0.685/-0.629                                                                                                                             | 0.56/-0.70                                                                                       |



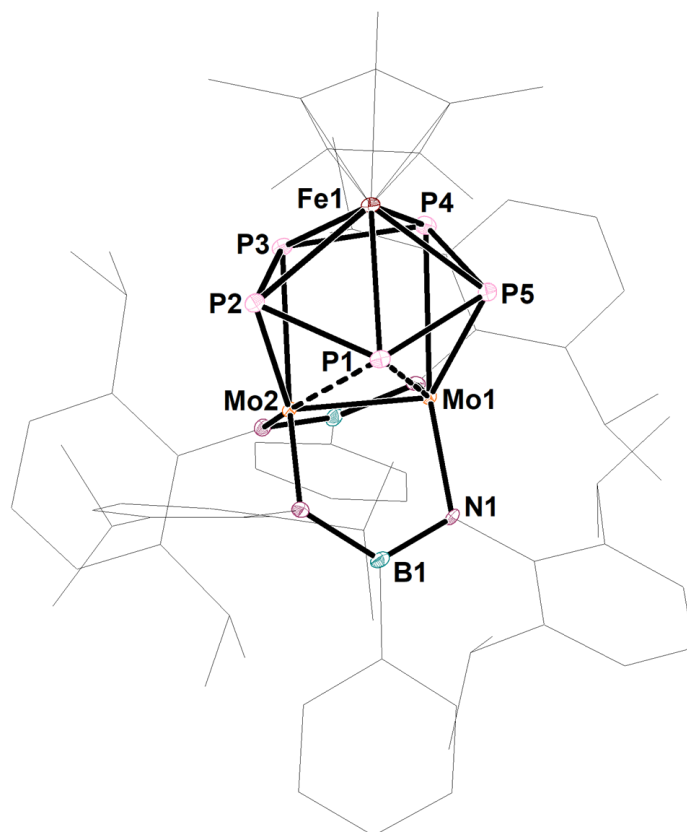

**Fig. S15.** The solid-state molecular structure of **4**. Thermal ellipsoids are drawn at the 30% probability level. The boraamidinato and Cp\* ligands are displayed in the wireframe model; hydrogen atoms are omitted for clarity.

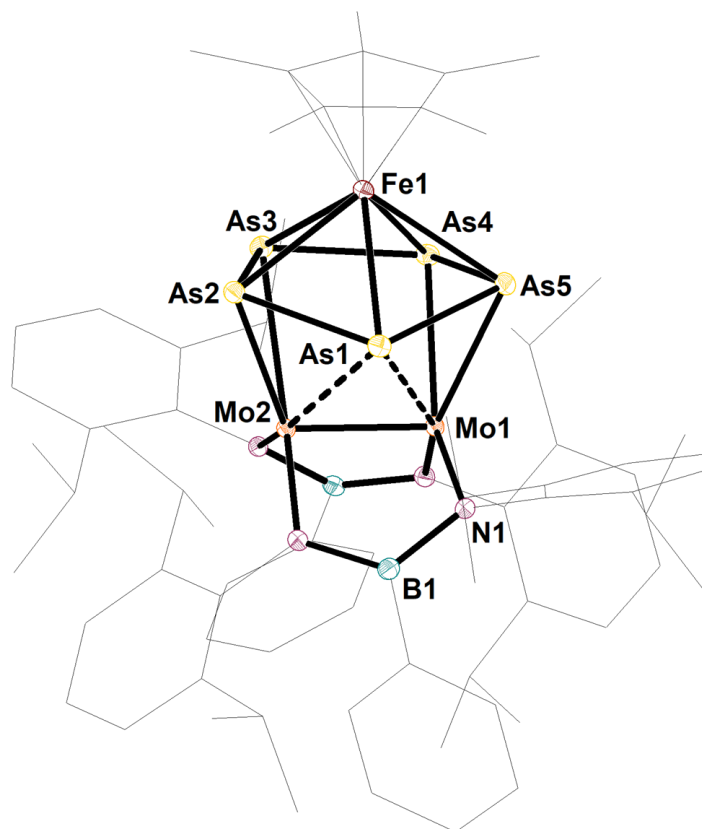

**Fig. S16.** The solid-state molecular structure of **5**. Thermal ellipsoids are drawn at the 30% probability level. The boraamidinato and Cp\* ligands are displayed in the wireframe model; hydrogen atoms are omitted for clarity.

**Table S1.** Selected bond lengths (Å) and angles (°) of **4** and **5**.

| E = P ( <b>4</b> ), As ( <b>5</b> ) | <b>4</b>   | <b>5</b>  |
|-------------------------------------|------------|-----------|
| Mo1–Mo2                             | 2.1989(3)  | 2.2026(3) |
| Mo1–E1                              | 2.8305(7)  | 2.9256(4) |
| Mo2–E1                              | 2.7973(8)  | 2.9249(4) |
| Mo1–E4                              | 2.6433(7)  | 2.6115(4) |
| Mo1–E5                              | 2.5156(7)  | 2.7037(4) |
| Mo2–E2                              | 2.5782(7)  | 2.6625(4) |
| Mo2–E3                              | 2.5031(7)  | 2.7577(4) |
| Fe1–E1                              | 2.4152(8)  | 2.5178(6) |
| Fe1–E2                              | 2.3402(8)  | 2.4404(6) |
| Fe1–E3                              | 2.4664(8)  | 2.5655(6) |
| Fe1–E4                              | 2.3875(8)  | 2.6042(6) |
| Fe1–E5                              | 2.3010(8)  | 2.4951(6) |
| E1–E2                               | 2.1534(10) | 2.3740(5) |
| E1–E5                               | 2.1697(10) | 2.3697(5) |
| E2–E3                               | 2.2270(10) | 2.3796(5) |
| E3–E4                               | 2.2464(9)  | 2.4627(5) |
| E4–E5                               | 2.1994(11) | 2.4162(5) |
| E1–E2–E3                            | 98.14(4)   | 102.49(2) |
| E2–E3–E4                            | 110.50(4)  | 106.18(2) |
| E3–E4–E5                            | 105.55(4)  | 111.06(2) |
| E1–E5–E4                            | 103.28(4)  | 97.52(2)  |
| E2–E1–E5                            | 114.61(4)  | 115.25(2) |
| E2–E3–E4–E5                         | 10.94(6)   | –7.86(5)  |

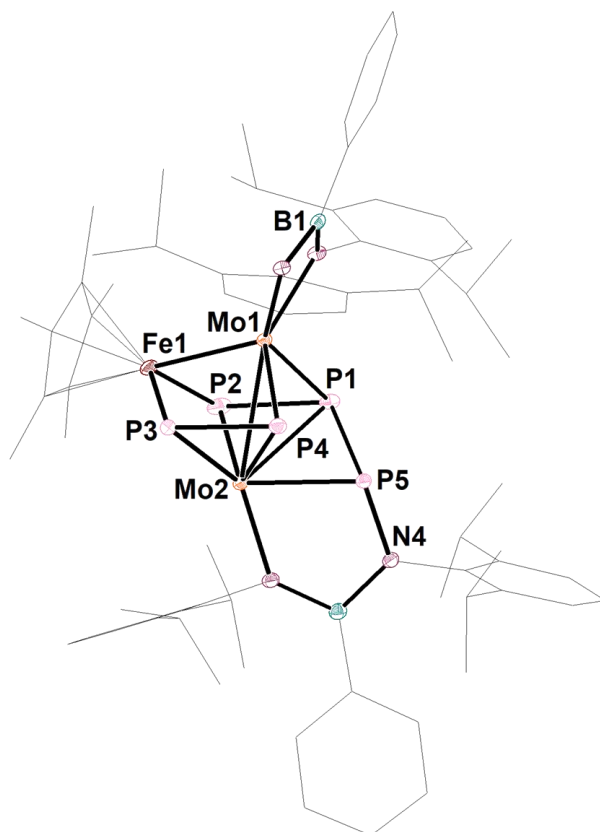

**Fig. S17.** The solid-state molecular structure of **6**. Thermal ellipsoids are drawn at the 30% probability level. The boraamidinato and Cp\* ligands are displayed in the wireframe model; hydrogen atoms are omitted for clarity. Selected bond lengths (Å) were labeled in the figure.

**Table S2.** Selected bond lengths (Å) and angles (°) of the experimental, optimised structures of **6**, and the transition state structure of **6-TS**.

|             | Exp. <b>6</b>     | Calc. <b>6</b> | <b>6-TS</b> |
|-------------|-------------------|----------------|-------------|
| Mo1–Mo2     | 2.8484(2)         | 2.879          | 2.863       |
| Mo1–Fe1     | 2.4022(9)         | 2.378          | 2.384       |
| Mo1–P1      | 2.4179(5)         | 2.429          | 2.420       |
| Mo1–P4      | 2.3602(5)         | 2.364          | 2.407       |
| Mo2–P1      | 2.5902(5)         | 2.638          | 2.615       |
| Mo2–P2      | 2.3466(5)         | 2.350          | 2.366       |
| Mo2–P3      | 2.4136(5)         | 2.464          | 2.379       |
| Mo2–P4      | 2.5618(5)         | 2.575          | 2.591       |
| Mo2–P5      | 2.4070(5)         | 2.442          | 2.416       |
| Fe1–P2      | 2.2044(7)         | 2.207          | 2.216       |
| Fe1–P3      | 2.2215(6)         | 2.230          | 2.216       |
| N4–P5       | 1.7183(16)        | 1.763          | 2.473       |
| P1–P2       | 2.2278(7)         | 2.256          | 2.263       |
| P1–P5       | 2.2730(6)         | 2.240          | 2.389       |
| P3–P4       | 2.1798(7)         | 2.201          | 2.257       |
| Fe–C        | 2.051(7)-2.242(7) | 2.110-2.165    | 2.108-2.157 |
| Mo2…Fe1     | 2.8445(10)        | 2.866          | 2.834       |
| Mo1…P2      | 2.7975(5)         | 2.921          | 2.825       |
| Mo1…P3      | 2.7388(5)         | 2.769          | 2.777       |
| P2…P3       | 3.5954(8)         | 3.623          | 3.602       |
| P1…P4       | 3.5194(7)         | 3.612          | 3.532       |
| P4…P5       | 2.6550(6)         | 2.913          | 2.473       |
| P1–P2–P3–P4 | –2.05(3)          | –6.22          | –1.71       |

**Table S3.** The calculated Mayer bond orders (MBOs) of **4-6**.

| E = P (4), As (5) | 4    | 5    | 6       |      |
|-------------------|------|------|---------|------|
| Mo1–Mo2           | 2.41 | 2.51 | Mo1–Mo2 | 0.44 |
| Mo1–E1            | 0.28 | 0.26 | Mo1–Fe1 | 0.97 |
| Mo2–E1            | 0.29 | 0.32 | Mo1–P1  | 0.85 |
| Mo1–E4            | 0.47 | 0.55 | Mo1–P4  | 1.07 |
| Mo1–E5            | 0.57 | 0.48 | Mo2–P1  | 0.52 |
| Mo2–E2            | 0.60 | 0.59 | Mo2–P2  | 0.98 |
| Mo2–E3            | 0.77 | 0.69 | Mo2–P3  | 0.78 |
| Fe1–E1            | 0.56 | 0.58 | Mo2–P4  | 0.70 |
| Fe1–E2            | 0.59 | 0.59 | Mo2–P5  | 0.94 |
| Fe1–E3            | 0.47 | 0.50 | Fe1–P2  | 0.91 |
| Fe1–E4            | 0.57 | 0.55 | Fe1–P3  | 0.85 |
| Fe1–E5            | 0.60 | 0.63 | N4–P5   | 1.02 |
| E1–E2             | 0.94 | 0.85 | P1–P2   | 0.84 |
| E1–E5             | 0.92 | 0.87 | P1–P5   | 0.90 |
| E2–E3             | 0.74 | 0.70 | P3–P4   | 0.95 |
| E3–E4             | 0.87 | 0.73 | Mo2…Fe1 | 0.35 |
| E4–E5             | 0.82 | 0.75 | Mo1…P2  | 0.26 |
|                   |      |      | Mo1…P3  | 0.39 |
|                   |      |      | P4…P5   | 0.12 |

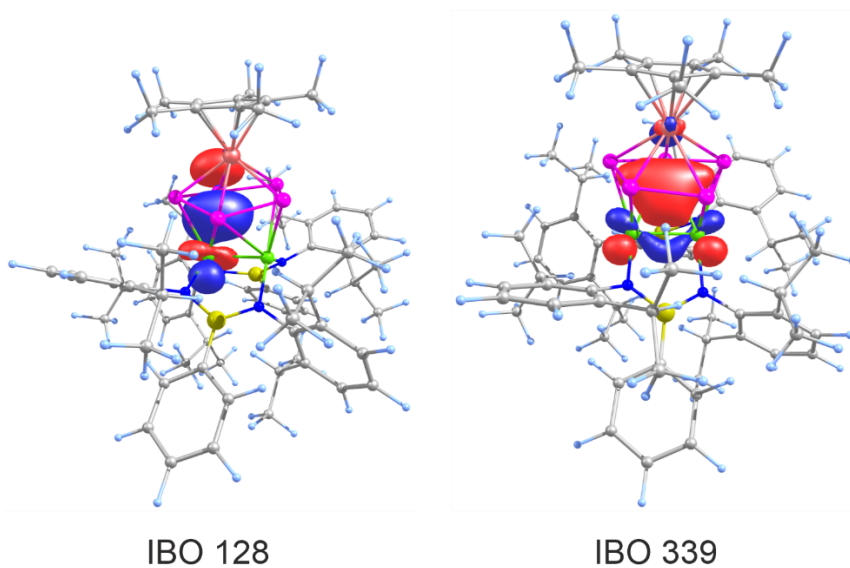

**Fig. S18.** Selected Intrinsic Bonding Orbitals representing the 2c-2e Mo–P bond (IBO 128) and the 3c-2e Mo<sub>2</sub>–P bond (IBO 339) of **4**. Only one IBO from each type is depicted.

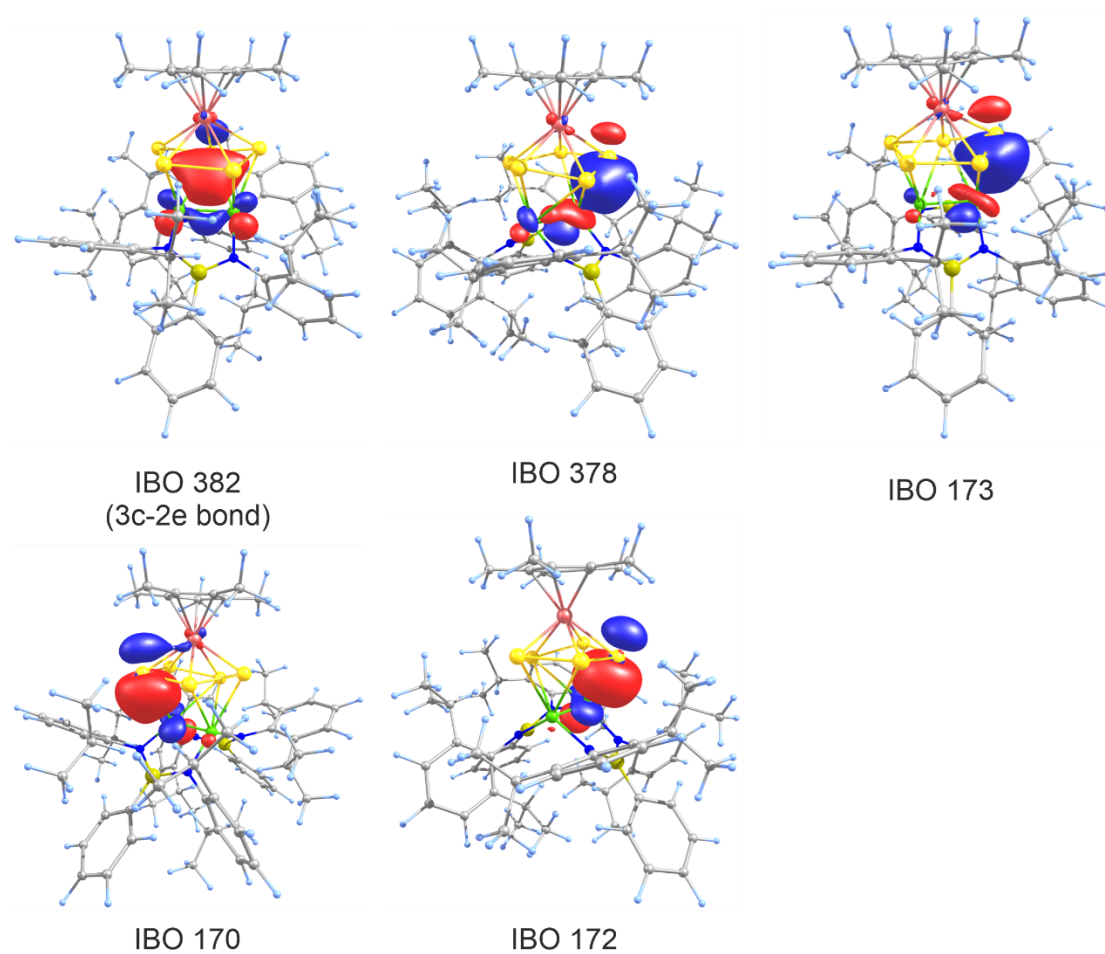

**Fig. S19.** Selected Intrinsic Bonding Orbitals representing the Mo–As bonding of **5**.

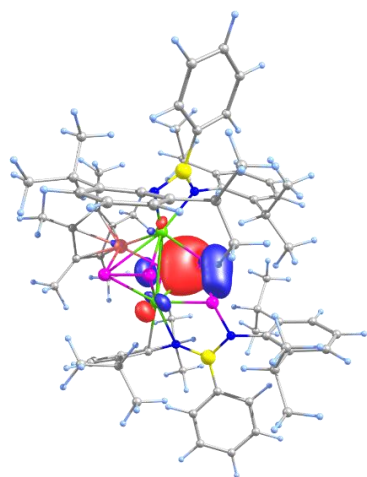

IBO 339

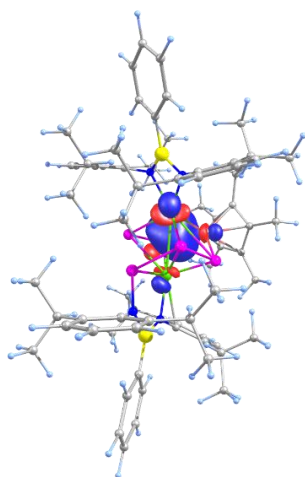

IBO 337

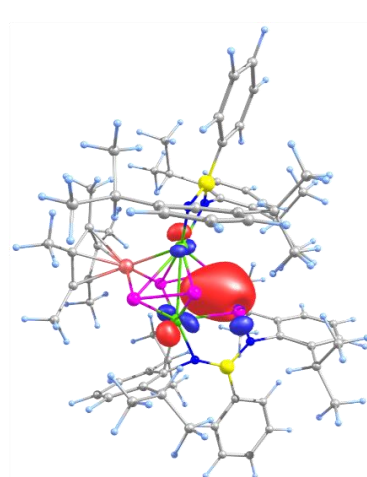

IBO 335

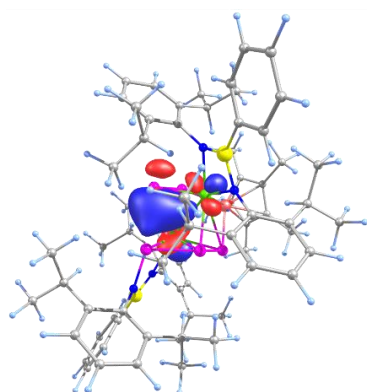

IBO 330

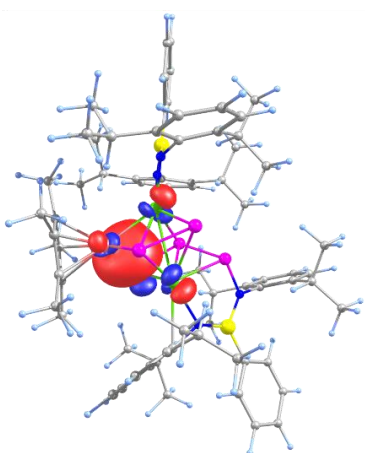

IBO 313

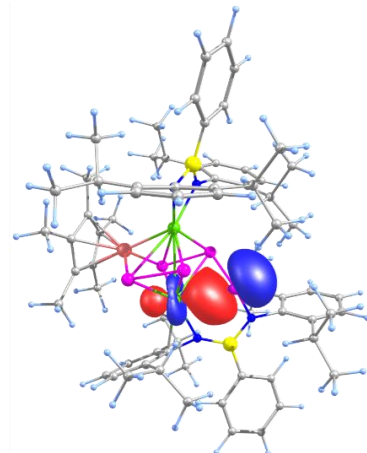

IBO 127

**Fig. S20.** Selected Intrinsic Bonding Orbitals of **6**.



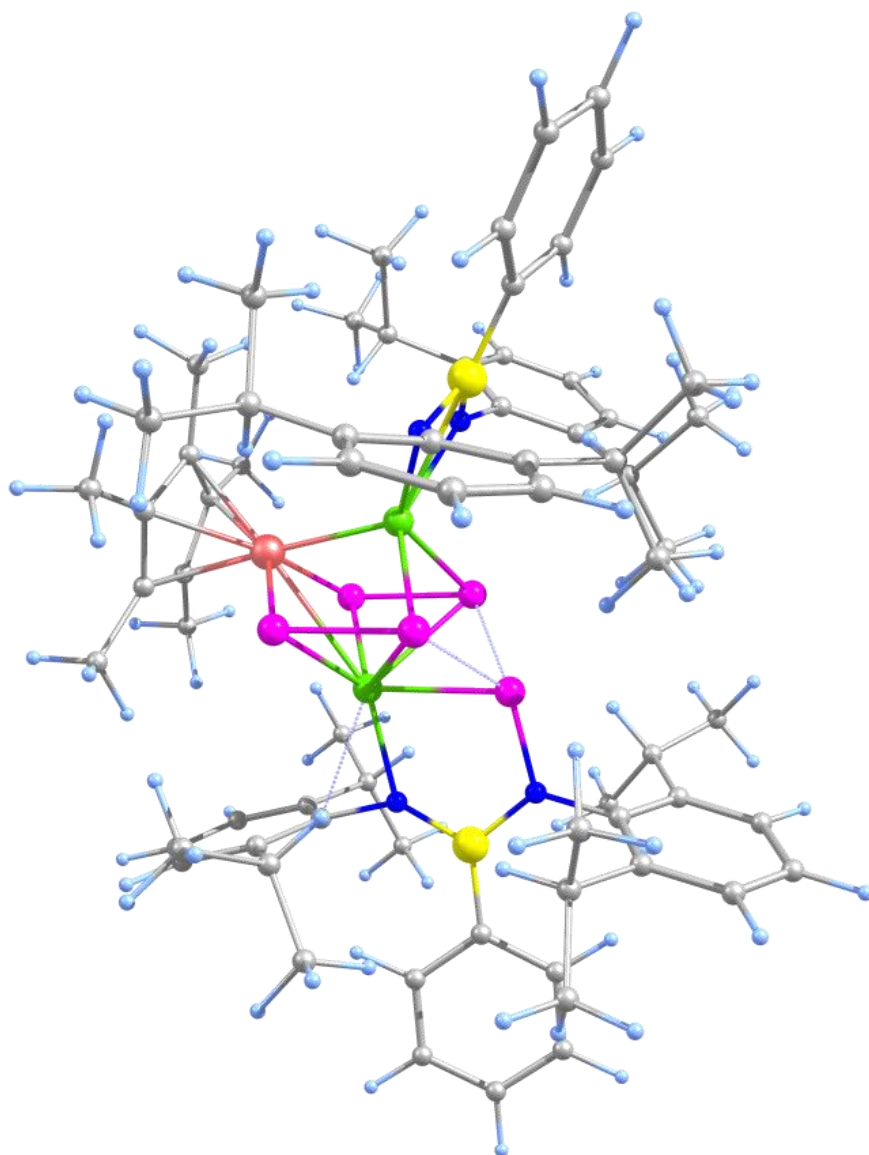

**Fig. S21.** The DFT-optimised transition state structure of **6-TS** calculated at the BP86-D4/def2-SVP CPCM(THF) level of theory.

#### 4-1. Cartesian coordinates of the optimised 4

FINAL SINGLE POINT ENERGY -6098.977810973585 a.u.

|    |              |             |              |
|----|--------------|-------------|--------------|
| Mo | 0.844087000  | 6.821638000 | 18.345267000 |
| Mo | -0.134488000 | 8.795454000 | 18.408497000 |
| Fe | -1.793388000 | 6.741037000 | 21.112848000 |
| P  | -1.395613000 | 8.963411000 | 20.544043000 |
| P  | 0.375591000  | 7.728470000 | 21.037598000 |
| P  | 0.210823000  | 5.611143000 | 20.531443000 |
| P  | -1.365902000 | 5.813928000 | 18.878209000 |
| P  | -2.558226000 | 7.728509000 | 19.091484000 |
| N  | 1.652293000  | 9.720036000 | 18.828602000 |
| N  | 2.605742000  | 7.438809000 | 19.296689000 |
| N  | -0.881383000 | 8.653145000 | 16.535967000 |
| N  | 0.615168000  | 6.658431000 | 16.324063000 |
| B  | 2.821348000  | 8.874152000 | 19.102865000 |
| B  | -0.185965000 | 7.687842000 | 15.667001000 |
| C  | -2.543587000 | 5.052814000 | 22.084048000 |
| C  | -1.774744000 | 5.860689000 | 23.008546000 |
| C  | -2.376276000 | 7.169568000 | 23.060728000 |
| C  | -3.525841000 | 7.167463000 | 22.179143000 |
| C  | -3.624325000 | 5.858919000 | 21.571690000 |
| C  | -2.307354000 | 3.609915000 | 21.764313000 |
| H  | -1.249070000 | 3.324153000 | 21.919207000 |
| H  | -2.930509000 | 2.966089000 | 22.422003000 |
| H  | -2.574080000 | 3.376246000 | 20.715062000 |
| C  | -0.603031000 | 5.399200000 | 23.814994000 |
| H  | -0.945514000 | 4.958871000 | 24.776202000 |
| H  | -0.017382000 | 4.625734000 | 23.280555000 |
| H  | 0.082412000  | 6.235635000 | 24.053962000 |
| C  | -1.923969000 | 8.304897000 | 23.924944000 |
| H  | -0.823469000 | 8.301448000 | 24.053372000 |
| H  | -2.211686000 | 9.284654000 | 23.497144000 |
| H  | -2.380929000 | 8.230012000 | 24.935211000 |
| C  | -4.488017000 | 8.298203000 | 21.987207000 |
| H  | -4.005770000 | 9.278332000 | 22.168584000 |
| H  | -4.902550000 | 8.307648000 | 20.960613000 |

|   |              |              |              |
|---|--------------|--------------|--------------|
| H | -5.336873000 | 8.202610000  | 22.697873000 |
| C | -4.692091000 | 5.389884000  | 20.633240000 |
| H | -4.293482000 | 4.664138000  | 19.897229000 |
| H | -5.504530000 | 4.882095000  | 21.197186000 |
| H | -5.142357000 | 6.231807000  | 20.074035000 |
| C | 4.308366000  | 9.433725000  | 19.126142000 |
| C | 3.245995000  | 4.909051000  | 14.313441000 |
| H | 4.205951000  | 5.139401000  | 13.825182000 |
| C | 2.241360000  | 13.105125000 | 17.339507000 |
| H | 2.586988000  | 13.544086000 | 16.390389000 |
| C | 3.107295000  | 7.355741000  | 14.916646000 |
| H | 2.335685000  | 8.035087000  | 15.328682000 |
| C | -0.290206000 | 7.852662000  | 14.093010000 |
| C | 2.210204000  | 11.705166000 | 17.473865000 |
| C | 1.308260000  | 5.637397000  | 15.609566000 |
| C | 1.742656000  | 11.136500000 | 18.699552000 |
| C | 2.544054000  | 5.941270000  | 14.960917000 |
| C | 2.737123000  | 10.849223000 | 16.327461000 |
| H | 2.766217000  | 9.799775000  | 16.680831000 |
| C | 0.757653000  | 4.324719000  | 15.502701000 |
| C | -1.366012000 | 11.563099000 | 16.981781000 |
| H | -0.411311000 | 11.004453000 | 17.105425000 |
| C | 5.381494000  | 8.550475000  | 18.847256000 |
| H | 5.165080000  | 7.498721000  | 18.619315000 |
| C | 3.492325000  | 8.387109000  | 22.114580000 |
| H | 2.920434000  | 9.006022000  | 21.391420000 |
| C | 3.701230000  | 6.999247000  | 21.510296000 |
| C | -2.162663000 | 9.202116000  | 16.254312000 |
| C | -2.430283000 | 10.584952000 | 16.510152000 |
| C | 1.863611000  | 13.950984000 | 18.390008000 |
| H | 1.893607000  | 15.044326000 | 18.264031000 |
| C | 1.410155000  | 11.992948000 | 19.793376000 |
| C | 4.336861000  | 6.067755000  | 22.356090000 |
| H | 4.593330000  | 6.376418000  | 23.381158000 |
| C | -0.655012000 | 9.108952000  | 13.546773000 |
| H | -0.852767000 | 9.952627000  | 14.221110000 |
| C | -3.112914000 | 6.892570000  | 15.449724000 |
| H | -2.071104000 | 6.571060000  | 15.660494000 |

|   |              |              |              |
|---|--------------|--------------|--------------|
| C | -0.655117000 | 3.986543000  | 15.967447000 |
| H | -1.097447000 | 4.915473000  | 16.379413000 |
| C | 1.471280000  | 13.387975000 | 19.610141000 |
| H | 1.213197000  | 14.049228000 | 20.452218000 |
| C | 4.658593000  | 10.771503000 | 19.437178000 |
| H | 3.876989000  | 11.501327000 | 19.678076000 |
| C | 3.702595000  | 5.280238000  | 19.746596000 |
| C | -0.074049000 | 6.799541000  | 13.168724000 |
| H | 0.190113000  | 5.798944000  | 13.530240000 |
| C | 3.466983000  | 4.766299000  | 18.334506000 |
| H | 2.943595000  | 5.561982000  | 17.755158000 |
| C | 4.852354000  | 9.070423000  | 22.372075000 |
| H | 5.408913000  | 8.536565000  | 23.170535000 |
| H | 5.486713000  | 9.086171000  | 21.467475000 |
| H | 4.708542000  | 10.116472000 | 22.710833000 |
| C | 2.242547000  | 11.815434000 | 22.157314000 |
| H | 2.349768000  | 12.915373000 | 22.261955000 |
| H | 2.042006000  | 11.401167000 | 23.166529000 |
| H | 3.212792000  | 11.414358000 | 21.808711000 |
| C | 1.502344000  | 3.325856000  | 14.845221000 |
| H | 1.084768000  | 2.309120000  | 14.773958000 |
| C | 4.654368000  | 4.771956000  | 21.943084000 |
| H | 5.144600000  | 4.066176000  | 22.631190000 |
| C | 2.746403000  | 3.600854000  | 14.265948000 |
| H | 3.314890000  | 2.804893000  | 13.760564000 |
| C | 3.346415000  | 6.604853000  | 20.169636000 |
| C | -3.724584000 | 11.099156000 | 16.310710000 |
| H | -3.908294000 | 12.166449000 | 16.509112000 |
| C | -3.240929000 | 8.373462000  | 15.789006000 |
| C | 2.689260000  | 8.344850000  | 23.429781000 |
| H | 1.705930000  | 7.854566000  | 23.288892000 |
| H | 3.238235000  | 7.796721000  | 24.222409000 |
| H | 2.506882000  | 9.372014000  | 23.804858000 |
| C | 7.034027000  | 10.305978000 | 19.166659000 |
| H | 8.082702000  | 10.642834000 | 19.180964000 |
| C | 4.342782000  | 4.397165000  | 20.633300000 |
| H | 4.605750000  | 3.387246000  | 20.282174000 |
| C | -0.206247000 | 6.989500000  | 11.784045000 |

|   |              |              |              |
|---|--------------|--------------|--------------|
| H | -0.036889000 | 6.143818000  | 11.099051000 |
| C | 5.994530000  | 11.202771000 | 19.464693000 |
| H | 6.223397000  | 12.249211000 | 19.720942000 |
| C | 3.407892000  | 7.813397000  | 13.478640000 |
| H | 4.197032000  | 7.191502000  | 13.006948000 |
| H | 2.503454000  | 7.764058000  | 12.840468000 |
| H | 3.773571000  | 8.860885000  | 13.478315000 |
| C | -4.041634000 | 6.009236000  | 16.305962000 |
| H | -3.883312000 | 6.177480000  | 17.388735000 |
| H | -5.109398000 | 6.215142000  | 16.084218000 |
| H | -3.856689000 | 4.935979000  | 16.098163000 |
| C | 1.096323000  | 11.463782000 | 21.188430000 |
| H | 1.037866000  | 10.358602000 | 21.122264000 |
| C | -1.112892000 | 12.662416000 | 15.933694000 |
| H | -0.889752000 | 12.231574000 | 14.938066000 |
| H | -2.003578000 | 13.316410000 | 15.828102000 |
| H | -0.254570000 | 13.295600000 | 16.234436000 |
| C | -0.555281000 | 8.251180000  | 11.273412000 |
| H | -0.655526000 | 8.404419000  | 10.187192000 |
| C | 6.719776000  | 8.971380000  | 18.855922000 |
| H | 7.522085000  | 8.252750000  | 18.625517000 |
| C | -1.515721000 | 3.534932000  | 14.770764000 |
| H | -1.161032000 | 2.565270000  | 14.363146000 |
| H | -2.573037000 | 3.398645000  | 15.078099000 |
| H | -1.490302000 | 4.274373000  | 13.946931000 |
| C | 4.347474000  | 7.479838000  | 15.812465000 |
| H | 4.093995000  | 7.227054000  | 16.856712000 |
| H | 5.157116000  | 6.798251000  | 15.479777000 |
| H | 4.746779000  | 8.512491000  | 15.803507000 |
| C | -4.516585000 | 8.941628000  | 15.609703000 |
| H | -5.336839000 | 8.297146000  | 15.257320000 |
| C | -3.399623000 | 6.656991000  | 13.953012000 |
| H | -4.460848000 | 6.883648000  | 13.719797000 |
| H | -2.765330000 | 7.294828000  | 13.310108000 |
| H | -3.217743000 | 5.599558000  | 13.677401000 |
| C | 4.169972000  | 11.252519000 | 15.933003000 |
| H | 4.207639000  | 12.292006000 | 15.545736000 |
| H | 4.863116000  | 11.180701000 | 16.793549000 |

|   |              |              |              |
|---|--------------|--------------|--------------|
| H | 4.548680000  | 10.591637000 | 15.126526000 |
| C | -0.780033000 | 9.314872000  | 12.164714000 |
| H | -1.060523000 | 10.308617000 | 11.781386000 |
| C | -4.775485000 | 10.290801000 | 15.867770000 |
| H | -5.784410000 | 10.706982000 | 15.723813000 |
| C | 1.803019000  | 10.895788000 | 15.109644000 |
| H | 0.798292000  | 10.523790000 | 15.373470000 |
| H | 1.697022000  | 11.928801000 | 14.719166000 |
| H | 2.189824000  | 10.261094000 | 14.288163000 |
| C | 2.582791000  | 3.510989000  | 18.330404000 |
| H | 3.068712000  | 2.679504000  | 18.880863000 |
| H | 1.608911000  | 3.710600000  | 18.819336000 |
| H | 2.386039000  | 3.170177000  | 17.297098000 |
| C | -0.699474000 | 2.927072000  | 17.080661000 |
| H | -1.751016000 | 2.695090000  | 17.347956000 |
| H | -0.211519000 | 1.981291000  | 16.763528000 |
| H | -0.193130000 | 3.279849000  | 17.998809000 |
| C | -1.733302000 | 12.178870000 | 18.341094000 |
| H | -2.664192000 | 12.777857000 | 18.267214000 |
| H | -1.902994000 | 11.392669000 | 19.105107000 |
| H | -0.924678000 | 12.840153000 | 18.703842000 |
| C | 4.800110000  | 4.493883000  | 17.612703000 |
| H | 5.471385000  | 5.374663000  | 17.643008000 |
| H | 5.335748000  | 3.644663000  | 18.086078000 |
| H | 4.617263000  | 4.236966000  | 16.550641000 |
| C | -0.236808000 | 11.985167000 | 21.752781000 |
| H | -0.205667000 | 13.083308000 | 21.914064000 |
| H | -1.086076000 | 11.762677000 | 21.080474000 |
| H | -0.449622000 | 11.510737000 | 22.733187000 |

## 4-2. Cartesian coordinates of the optimised 5

FINAL SINGLE POINT ENERGY -15572.794197007026 a.u.

|    |              |              |              |
|----|--------------|--------------|--------------|
| Mo | 11.864082000 | 7.235004000  | 30.543364000 |
| Mo | 13.748897000 | 6.086810000  | 30.517151000 |
| Fe | 13.968587000 | 8.804051000  | 27.723936000 |
| As | 12.758466000 | 6.597783000  | 27.767658000 |
| As | 11.571689000 | 8.619978000  | 28.305449000 |
| As | 13.006158000 | 9.687143000  | 29.926924000 |
| As | 15.069256000 | 8.282558000  | 29.998653000 |
| As | 15.110649000 | 6.595117000  | 28.209443000 |
| N  | 13.989306000 | 6.256480000  | 32.539103000 |
| N  | 12.118706000 | 7.918741000  | 32.434412000 |
| N  | 10.764591000 | 5.524163000  | 30.127415000 |
| N  | 12.943200000 | 4.388346000  | 29.572087000 |
| B  | 13.046308000 | 7.122474000  | 33.250249000 |
| B  | 11.502325000 | 4.290399000  | 29.832044000 |
| C  | 15.026174000 | 10.548496000 | 27.284979000 |
| C  | 15.681642000 | 9.411650000  | 26.686955000 |
| C  | 14.743397000 | 8.772492000  | 25.785506000 |
| C  | 13.511967000 | 9.519913000  | 25.824029000 |
| C  | 13.687327000 | 10.623784000 | 26.745984000 |
| C  | 15.660695000 | 11.517756000 | 28.234130000 |
| H  | 16.261500000 | 12.271573000 | 27.680136000 |
| H  | 16.340698000 | 11.000457000 | 28.939662000 |
| H  | 14.901000000 | 12.059218000 | 28.829594000 |
| C  | 17.117505000 | 9.039717000  | 26.897321000 |
| H  | 17.424063000 | 9.189862000  | 27.951366000 |
| H  | 17.772069000 | 9.676510000  | 26.263410000 |
| H  | 17.316469000 | 7.984144000  | 26.630534000 |
| C  | 15.018103000 | 7.603732000  | 24.891141000 |
| H  | 15.813405000 | 6.948824000  | 25.296640000 |
| H  | 15.346139000 | 7.952831000  | 23.888034000 |
| H  | 14.111647000 | 6.981972000  | 24.749608000 |
| C  | 12.304966000 | 9.250457000  | 24.979934000 |
| H  | 12.150991000 | 8.164015000  | 24.825501000 |
| H  | 12.419831000 | 9.718691000  | 23.978238000 |

|   |              |              |              |
|---|--------------|--------------|--------------|
| H | 11.383660000 | 9.659558000  | 25.437861000 |
| C | 12.700069000 | 11.720272000 | 27.002474000 |
| H | 12.796404000 | 12.125465000 | 28.028439000 |
| H | 11.655357000 | 11.376154000 | 26.871185000 |
| H | 12.867604000 | 12.556538000 | 26.289442000 |
| C | 9.351267000  | 5.527293000  | 30.323790000 |
| C | 10.825032000 | 2.850346000  | 29.837678000 |
| C | 8.803920000  | 5.071794000  | 31.565233000 |
| C | 11.666715000 | 9.221914000  | 32.785885000 |
| C | 12.945432000 | 7.199783000  | 34.832827000 |
| C | 14.968378000 | 5.472122000  | 33.223422000 |
| C | 9.229511000  | 8.612248000  | 32.127312000 |
| H | 9.712785000  | 7.625317000  | 31.951673000 |
| C | 7.412053000  | 5.128094000  | 31.761736000 |
| H | 6.994567000  | 4.792612000  | 32.724071000 |
| C | 11.736637000 | 7.632186000  | 35.433827000 |
| H | 10.882702000 | 7.896402000  | 34.796617000 |
| C | 9.454392000  | 2.606044000  | 29.570599000 |
| H | 8.781050000  | 3.442372000  | 29.351936000 |
| C | 15.001308000 | 3.134471000  | 29.054001000 |
| C | 16.326486000 | 5.906484000  | 33.301322000 |
| C | 10.298040000 | 9.592777000  | 32.585063000 |
| C | 11.818205000 | 3.497042000  | 26.807086000 |
| H | 11.266460000 | 4.124916000  | 27.537305000 |
| C | 13.684905000 | 3.571579000  | 28.680936000 |
| C | 13.885758000 | 7.017065000  | 37.106509000 |
| H | 14.744469000 | 6.782513000  | 37.755106000 |
| C | 11.589634000 | 7.742411000  | 36.824688000 |
| H | 10.630146000 | 8.076919000  | 37.249697000 |
| C | 17.835843000 | 7.248837000  | 31.731787000 |
| H | 18.743969000 | 6.698759000  | 32.057285000 |
| H | 18.144166000 | 8.277665000  | 31.453834000 |
| H | 17.451587000 | 6.756348000  | 30.818423000 |
| C | 8.158816000  | 8.406249000  | 33.215777000 |
| H | 8.612151000  | 8.137096000  | 34.189813000 |
| H | 7.464718000  | 7.593745000  | 32.922558000 |
| H | 7.564084000  | 9.331952000  | 33.363456000 |
| C | 16.911179000 | 3.855220000  | 34.509959000 |



|   |              |              |              |
|---|--------------|--------------|--------------|
| H | 17.668650000 | 3.216344000  | 34.989714000 |
| C | 14.015635000 | 6.902074000  | 35.713505000 |
| H | 14.984130000 | 6.586448000  | 35.309420000 |
| C | 12.668290000 | 7.432691000  | 37.671337000 |
| H | 12.561491000 | 7.519745000  | 38.764226000 |
| C | 14.061536000 | 9.987181000  | 33.549086000 |
| H | 14.307621000 | 8.938134000  | 33.280924000 |
| C | 14.578252000 | 4.266849000  | 33.883658000 |
| C | 11.627698000 | 1.709787000  | 30.089366000 |
| H | 12.701795000 | 1.838573000  | 30.275011000 |
| C | 8.464963000  | 5.932565000  | 29.277963000 |
| C | 8.575744000  | 9.051221000  | 30.807044000 |
| H | 8.063963000  | 10.029351000 | 30.917099000 |
| H | 7.828095000  | 8.305084000  | 30.478394000 |
| H | 9.328414000  | 9.153672000  | 29.999359000 |
| C | 15.563578000 | 3.473452000  | 34.498339000 |
| H | 15.262873000 | 2.535913000  | 34.991541000 |
| C | 7.078366000  | 5.956569000  | 29.522250000 |
| H | 6.399381000  | 6.272149000  | 28.714668000 |
| C | 12.582922000 | 10.226044000 | 33.256759000 |
| C | 6.544573000  | 5.577509000  | 30.759076000 |
| H | 5.458375000  | 5.614670000  | 30.934957000 |
| C | 16.776885000 | 7.289430000  | 32.845700000 |
| H | 15.883622000 | 7.810257000  | 32.445992000 |
| C | 12.110355000 | 11.531244000 | 33.494582000 |
| H | 12.821037000 | 12.292593000 | 33.851679000 |
| C | 11.837873000 | 4.245767000  | 25.459141000 |
| H | 12.410944000 | 5.192352000  | 25.515616000 |
| H | 10.804088000 | 4.491536000  | 25.143608000 |
| H | 12.286966000 | 3.624703000  | 24.657446000 |
| C | 17.274909000 | 5.075081000  | 33.929396000 |
| H | 18.324567000 | 5.405431000  | 33.977708000 |
| C | 15.571340000 | 3.306941000  | 30.454529000 |
| H | 14.860110000 | 3.924181000  | 31.050826000 |
| C | 8.944307000  | 6.234997000  | 27.863561000 |
| H | 10.051152000 | 6.274235000  | 27.892029000 |
| C | 13.217123000 | 3.225906000  | 27.359669000 |
| C | 9.883286000  | 10.912840000 | 32.839375000 |

|   |              |              |              |
|---|--------------|--------------|--------------|
| H | 8.825920000  | 11.177847000 | 32.682739000 |
| C | 15.811494000 | 2.442675000  | 28.136514000 |
| H | 16.816006000 | 2.119382000  | 28.450143000 |
| C | 9.663275000  | 4.465894000  | 32.669475000 |
| H | 10.691294000 | 4.360303000  | 32.271063000 |
| C | 14.348074000 | 10.190942000 | 35.051358000 |
| H | 14.217634000 | 11.257767000 | 35.328843000 |
| H | 15.391037000 | 9.909063000  | 35.296874000 |
| H | 13.670030000 | 9.589752000  | 35.683872000 |
| C | 11.101443000 | 0.409136000  | 30.102004000 |
| H | 11.761863000 | -0.447122000 | 30.311686000 |
| C | 8.917104000  | 1.308806000  | 29.562889000 |
| H | 7.847898000  | 1.163916000  | 29.341591000 |
| C | 13.123128000 | 3.828924000  | 33.979922000 |
| H | 12.500328000 | 4.666278000  | 33.609800000 |
| C | 11.047205000 | 2.172040000  | 26.621933000 |
| H | 9.998503000  | 2.369096000  | 26.319290000 |
| H | 11.032652000 | 1.564479000  | 27.544142000 |
| H | 11.517308000 | 1.565294000  | 25.820105000 |
| C | 9.167237000  | 3.065006000  | 33.072797000 |
| H | 8.147864000  | 3.103769000  | 33.510241000 |
| H | 9.833814000  | 2.629551000  | 33.844849000 |
| H | 9.142296000  | 2.375576000  | 32.206858000 |
| C | 12.700213000 | 3.540653000  | 35.430902000 |
| H | 11.620499000 | 3.289081000  | 35.474144000 |
| H | 12.876969000 | 4.416945000  | 36.085284000 |
| H | 13.253650000 | 2.677369000  | 35.855556000 |
| C | 10.775840000 | 11.890865000 | 33.287736000 |
| H | 10.435331000 | 12.920881000 | 33.474783000 |
| C | 15.370060000 | 2.149178000  | 26.843937000 |
| H | 16.019995000 | 1.618802000  | 26.131099000 |
| C | 16.931104000 | 4.018695000  | 30.447590000 |
| H | 17.286632000 | 4.192665000  | 31.480048000 |
| H | 16.867730000 | 4.998795000  | 29.934500000 |
| H | 17.697229000 | 3.414405000  | 29.920344000 |
| C | 8.424507000  | 7.576978000  | 27.318893000 |
| H | 7.324988000  | 7.553515000  | 27.166513000 |
| H | 8.890081000  | 7.799573000  | 26.336480000 |

|   |              |              |              |
|---|--------------|--------------|--------------|
| H | 8.653478000  | 8.418347000  | 28.000205000 |
| C | 14.990440000 | 10.898873000 | 32.721966000 |
| H | 14.800786000 | 10.814601000 | 31.634098000 |
| H | 16.051995000 | 10.633441000 | 32.901567000 |
| H | 14.861900000 | 11.964903000 | 33.002791000 |
| C | 9.736386000  | 0.201440000  | 29.838519000 |
| H | 9.316788000  | -0.817029000 | 29.839882000 |
| C | 15.684966000 | 1.942994000  | 31.162766000 |
| H | 16.441424000 | 1.306487000  | 30.658080000 |
| H | 14.723115000 | 1.394913000  | 31.152939000 |
| H | 15.993607000 | 2.078326000  | 32.218300000 |
| C | 17.300546000 | 8.106424000  | 34.042892000 |
| H | 16.559880000 | 8.147114000  | 34.864874000 |
| H | 17.526348000 | 9.147909000  | 33.733897000 |
| H | 18.235677000 | 7.671070000  | 34.453184000 |
| C | 8.541031000  | 5.095345000  | 26.907446000 |
| H | 8.950670000  | 4.120624000  | 27.233152000 |
| H | 8.909871000  | 5.297624000  | 25.880973000 |
| H | 7.436466000  | 4.996522000  | 26.854773000 |
| C | 14.077273000 | 2.533509000  | 26.482982000 |
| H | 13.711424000 | 2.286534000  | 25.474720000 |
| C | 9.733208000  | 5.385734000  | 33.895635000 |
| H | 10.179586000 | 6.357995000  | 33.627353000 |
| H | 10.356168000 | 4.940084000  | 34.695501000 |
| H | 8.724499000  | 5.573416000  | 34.317252000 |
| C | 12.858524000 | 2.622419000  | 33.071085000 |
| H | 13.485315000 | 1.754491000  | 33.361772000 |
| H | 13.089344000 | 2.875238000  | 32.022191000 |
| H | 11.799082000 | 2.305855000  | 33.114759000 |

### 4-3. Cartesian coordinates of the optimised 6

FINAL SINGLE POINT ENERGY -6098.988431987543 a.u.)

|    |                   |                   |                   |
|----|-------------------|-------------------|-------------------|
| Mo | 1.51820564344526  | -0.32895464625666 | -1.02681165315302 |
| Mo | -1.09222923245626 | 0.87303999866319  | -0.85482454303447 |
| Fe | 0.53403952649512  | 2.18333985434314  | -1.99204074301270 |
| P  | 0.37350202205817  | 0.26900655429566  | -3.12472185989605 |
| P  | -0.73182793705407 | -1.20568730373308 | -1.92122265287260 |
| P  | 0.46993504318652  | -1.72535036676683 | 0.68047565154119  |
| P  | 0.23152631663863  | 0.45397432472644  | 1.13861843625207  |
| P  | 1.55899236610854  | 1.81774566344270  | -0.07198695109589 |
| N  | -3.03224074397127 | 0.69439811562510  | -1.51640875892630 |
| B  | -3.55340476870749 | 1.27481626402753  | -0.28129001541167 |
| N  | -2.42591203707789 | 1.64004253198940  | 0.54183392565852  |
| N  | 3.06987230597031  | -1.34003988551787 | -0.21516058406954 |
| B  | 3.14695206360472  | -2.19231849730747 | 0.93859066372633  |
| N  | 1.86022937257846  | -2.30176388111877 | 1.59768824543942  |
| C  | 3.96092783328850  | -0.77547232758058 | -1.12485794719451 |
| C  | 3.76571390315496  | -1.10419355909030 | -2.51716164411976 |
| C  | 4.95562614064194  | 0.18225279102555  | -0.71848015358141 |
| C  | -3.13712136503993 | 1.31307766245015  | -5.86229281441963 |
| C  | -0.43074308121815 | 3.06309833145461  | -5.07617147724441 |
| C  | 2.58635364199851  | 2.31833496279072  | -4.61367757349205 |
| C  | 2.45154410415611  | -2.25992705766409 | -4.39220579658234 |
| C  | -4.16372448107535 | -1.05129980873002 | -4.61256949991641 |
| C  | -3.28735231365657 | 1.32055949601763  | -4.33546772851600 |
| C  | -4.28814927134475 | 2.41733932038664  | -3.91569621510384 |
| C  | 0.30818107464389  | 3.30202847537973  | -3.80212090482236 |
| C  | -4.60782130450439 | -2.27939217963028 | -4.10495580524062 |
| C  | 1.70474221452342  | 2.98832674442245  | -3.60833779806847 |
| C  | -3.68888728771158 | -0.03287774382918 | -3.76560168011003 |
| C  | 4.57010444637591  | -0.44977377675719 | -3.47438424192319 |
| C  | 5.55077131830481  | 0.46361234430402  | -3.07933299071434 |
| C  | -1.51051391950653 | 4.68473867748300  | -2.53435021516965 |
| C  | -0.15618515959108 | 4.06014414812697  | -2.66662823735425 |
| C  | 2.83518863813247  | -2.25691833490491 | -2.91093547490227 |
| C  | 3.41473437915198  | -3.61617450838444 | -2.47899934276243 |

|   |                   |                   |                   |
|---|-------------------|-------------------|-------------------|
| C | 2.12360859717907  | 3.60010982860700  | -2.38276931896211 |
| C | -4.61236914032262 | -2.47981240092470 | -2.72197345955107 |
| C | -3.63596722029844 | -0.26239293979599 | -2.35283960270470 |
| C | 0.97952010103099  | 4.26724361462863  | -1.80081275531944 |
| C | 3.53479138880590  | 3.66957695549366  | -1.88776106254834 |
| C | 5.74308141507171  | 0.76532889535341  | -1.71686572729864 |
| C | -4.15485405869767 | -1.49197706891169 | -1.82914661069253 |
| C | 1.03541497680989  | 5.14391151874878  | -0.59152448076789 |
| C | -6.08080507136806 | 1.27632979508649  | -0.94062254768013 |
| C | -7.44251497634381 | 1.49893631227481  | -0.67787864965034 |
| C | -4.25603290993798 | -1.79582392782726 | -0.34010568162425 |
| C | -5.08372080308125 | 1.51550376121396  | 0.03730942925686  |
| C | -7.84802409521447 | 1.96479796200557  | 0.58467061149628  |
| C | -5.71136167718946 | -2.10476827068572 | 0.05911937858452  |
| C | -3.56304815463378 | 4.71763041482298  | 0.57643330200143  |
| C | 5.48291267799108  | -3.18033056852046 | 0.39787314155532  |
| C | 6.61242434408713  | -3.96405549551636 | 0.67942216405900  |
| C | -3.31056269597651 | -2.93126095176767 | 0.08890367620781  |
| C | 1.66434519339662  | -6.32232353727904 | 2.06129428688071  |
| C | 5.18346485503676  | 0.51283102789888  | 0.75019334907031  |
| C | -6.87932457346766 | 2.21619340795834  | 1.57283213812139  |
| C | -5.52070275929954 | 1.99871067421828  | 1.29680854175873  |
| C | -2.16271367589963 | 4.46222167115039  | 1.16970391310905  |
| C | 5.03833882836123  | 2.01558541682113  | 1.04666116158005  |
| C | -0.66130828733537 | -5.32582490867295 | 1.72125163788018  |
| C | 4.42621643976012  | -3.02221425160976 | 1.33162597317261  |
| C | 0.83705697887256  | -5.03112104203404 | 1.91983299757976  |
| C | -1.56425402644401 | 5.79529800033620  | 1.64302302341582  |
| C | 6.55611668044019  | 0.00358987357086  | 1.23208776878266  |
| C | 6.72742997468507  | -4.60904095887582 | 1.92280563495851  |
| C | -2.34265229160082 | 2.00912546016874  | 1.89594011785728  |
| C | 4.56877176216263  | -3.68891999445401 | 2.57608653867027  |
| C | -2.18017698729336 | 3.38762137852414  | 2.24883412545779  |
| C | 5.70086151681598  | -4.46456986850961 | 2.87196590956431  |
| C | 1.06369680858578  | -4.09165535978157 | 3.09661792237873  |
| C | 1.58426450453370  | -2.78515955600161 | 2.91238893359422  |
| C | -2.66862522444086 | -0.45299676032138 | 2.67134642841620  |
| C | -2.38201433123717 | 1.02157803612476  | 2.93598240557793  |

|   |                   |                   |                   |
|---|-------------------|-------------------|-------------------|
| C | -4.15164775603696 | -0.75548305266373 | 2.96541812534340  |
| C | -2.06339393824032 | 3.74342855652930  | 3.60541649854971  |
| C | 0.77424741739832  | -4.51252223373340 | 4.40933167432411  |
| C | -1.78584870111405 | -1.40939924123523 | 3.48910275220333  |
| C | 1.80557862730358  | -1.90715310506280 | 4.01068469915107  |
| C | 2.37589733107788  | -0.50627405207018 | 3.80833822102145  |
| C | -2.25018106382627 | 1.43300079117030  | 4.27740127036849  |
| C | 3.86683944373387  | -0.45139882410086 | 4.19310669847964  |
| C | -2.09218584467124 | 2.77840458646415  | 4.62127761478949  |
| C | 1.00004691145290  | -3.66860143738750 | 5.50546809123867  |
| C | 1.51514915533762  | -2.37918151142118 | 5.30386909424374  |
| C | 1.56965399018345  | 0.57594568626419  | 4.54544913820007  |
| H | -4.09969498900477 | 1.07698265810828  | -6.36204357169850 |
| H | -2.82817124991217 | 2.31054500474063  | -6.22951101844307 |
| H | -2.38471669323035 | 0.57361744253267  | -6.20438390574601 |
| H | 0.01703065979036  | 3.68748744978570  | -5.87972795060316 |
| H | -4.19499004040314 | -0.88406310071817 | -5.69759467429337 |
| H | 2.91384745571217  | 3.05142176033562  | -5.38326450033676 |
| H | -0.37215770259016 | 2.00851419909287  | -5.40908152170160 |
| H | -1.49271040372550 | 3.34651743970395  | -4.98865078521742 |
| H | 3.32356685025720  | -2.50067483641077 | -5.03478198578535 |
| H | 2.05964356763035  | 1.49902030385719  | -5.14267483437332 |
| H | 2.03987893054418  | -1.28024711096527 | -4.70759790573742 |
| H | 1.67753491199132  | -3.03083241250863 | -4.57771739529072 |
| H | -4.96420633300217 | -3.06764286021899 | -4.78625338993560 |
| H | -3.99939859927216 | 3.39759343817571  | -4.34954120946027 |
| H | -5.30969840835837 | 2.17825958109827  | -4.27957658533408 |
| H | 4.44310973753045  | -0.68062432810527 | -4.54069451526241 |
| H | 3.49301140605326  | 1.89361162965377  | -4.14554161921861 |
| H | -1.55985795722948 | 5.63624974757345  | -3.10787410446606 |
| H | -2.30676571678595 | 1.57592627780549  | -3.87492321344179 |
| H | 6.18030521905493  | 0.95151419669433  | -3.83900459036338 |
| H | -2.30522938773750 | 4.01921440510471  | -2.91702876075464 |
| H | 4.41265574654719  | -3.77809861239604 | -2.93671551592039 |
| H | -4.32946466754762 | 2.52905157842925  | -2.81623658262484 |
| H | 2.74286014876735  | -4.43474357113155 | -2.80718397324699 |
| H | 4.10082700526933  | 4.42885692901256  | -2.47007922550420 |
| H | 1.86700042808484  | -2.16950951823676 | -2.34081017821102 |

|   |                   |                   |                   |
|---|-------------------|-------------------|-------------------|
| H | 4.05841149237664  | 2.70197297973171  | -2.00200566647081 |
| H | -4.98713090079344 | -3.43241293106829 | -2.31527903675780 |
| H | -1.74831296014966 | 4.91679550292423  | -1.48210521099469 |
| H | -5.78926731917842 | 0.90117721567152  | -1.93157557146229 |
| H | 3.52426424800125  | -3.68692761170402 | -1.38109523914850 |
| H | -8.19171505204477 | 1.30364649121447  | -1.46133268981688 |
| H | 6.52496466375728  | 1.48644964235905  | -1.43189966718032 |
| H | 1.51477256775919  | 6.11278218278847  | -0.85024279961124 |
| H | 3.58813461496183  | 3.96202935192002  | -0.82299484836264 |
| H | 0.02801761380018  | 5.36311039082385  | -0.20483912326057 |
| H | -3.52915592466577 | 5.55232754559298  | -0.15442312821430 |
| H | 5.42625067014607  | -2.68339035802714 | -0.58091340595838 |
| H | -6.08667542669100 | -3.01410312678336 | -0.45422093674963 |
| H | -6.38404925322938 | -1.26344843099957 | -0.19891975539849 |
| H | 7.40892280368088  | -4.06753584368870 | -0.07387540064023 |
| H | -3.96018412081377 | 3.82750619956226  | 0.05782223732262  |
| H | 1.53931041312116  | -6.96387637403261 | 1.16443067292948  |
| H | 1.62542370071313  | 4.69090108857043  | 0.23013158872455  |
| H | -8.91527025777142 | 2.13576577021177  | 0.79742048165862  |
| H | -3.53427979611782 | -3.87268548391597 | -0.45534063382974 |
| H | -0.82013085641790 | -5.97249911134818 | 0.83337082027562  |
| H | -1.52705194457885 | 4.05250194838422  | 0.35142776137137  |
| H | -1.47426388571818 | 6.49750874521020  | 0.78933195828207  |
| H | -3.94721483443735 | -0.88732854782660 | 0.21342420349232  |
| H | -2.25203086267008 | -2.66736023428453 | -0.10303854995772 |
| H | 5.80472629703983  | 2.61437606901871  | 0.51158319336477  |
| H | 1.19690062299178  | -4.51107314027815 | 1.00893903519463  |
| H | 4.03636396400998  | 2.38590865511026  | 0.75401950030372  |
| H | -4.28325284050091 | 4.99618717718839  | 1.37376527249847  |
| H | 7.38045754018980  | 0.52889879911067  | 0.70553875749197  |
| H | 2.74379035073449  | -6.09363306243092 | 2.17274159474331  |
| H | -5.78877323074939 | -2.28319087332158 | 1.14992363744857  |
| H | 6.67439789140425  | -1.08292342434168 | 1.06057387423636  |
| H | 1.34895874226700  | -6.91674160936154 | 2.94455373045846  |
| H | 7.61370108388897  | -5.22159358835986 | 2.15139079286344  |
| H | 4.40097832008457  | -0.01541666182566 | 1.33177318868924  |
| H | -1.23234557447052 | -4.38819180594436 | 1.56734148378582  |
| H | -3.41336350434568 | -3.13705766685444 | 1.17395013930828  |

|   |                   |                   |                  |
|---|-------------------|-------------------|------------------|
| H | -7.18534920929339 | 2.58742542337409  | 2.56371572390306 |
| H | -4.78068549709494 | 2.21883166487037  | 2.07924513353744 |
| H | -0.55996186147645 | 5.67134648961183  | 2.09550100054797 |
| H | -1.09226439763614 | -5.84780007838438 | 2.60155768096546 |
| H | -2.21744266284600 | 6.28940403808107  | 2.39210979369195 |
| H | -2.47488057991130 | -0.64845325682704 | 1.59706765568699 |
| H | 5.16604710889828  | 2.20144157991009  | 2.13298340879783 |
| H | 6.67397881707199  | 0.19341243555320  | 2.31862135381277 |
| H | -4.83246006425241 | -0.17052705454887 | 2.32024167116041 |
| H | 3.78147012983726  | -3.60338603266620 | 3.33644230133282 |
| H | 5.77978849041184  | -4.96273935170305 | 3.85094568481498 |
| H | -4.37066836159697 | -1.83155180966546 | 2.81149811469993 |
| H | 2.30381565578086  | -0.27874666384053 | 2.72438933295212 |
| H | -1.93653130066326 | -2.45285809741890 | 3.14608153422343 |
| H | -1.94647923366002 | 4.80100008852297  | 3.88065950992714 |
| H | 4.46426937762212  | -1.17933988235071 | 3.61026758478551 |
| H | 0.36963766908762  | -5.52325468086297 | 4.57667954183276 |
| H | -0.70934907303515 | -1.17999500443530 | 3.38812298820970 |
| H | -4.39203437514990 | -0.51136920360686 | 4.02149854103494 |
| H | 4.27912026613112  | 0.56073408878793  | 4.00209832781613 |
| H | -2.03702264994164 | -1.38080675492006 | 4.56969719511172 |
| H | -2.28753614172744 | 0.67358400618521  | 5.07324719688601 |
| H | 4.00921794835175  | -0.68080447144525 | 5.27033322633717 |
| H | 1.96264067884359  | 1.58224660755707  | 4.29242603173523 |
| H | 0.50012480561382  | 0.55246325178708  | 4.25670027645687 |
| H | -1.99436232983225 | 3.07795728598773  | 5.67631785641080 |
| H | 0.77080138994895  | -4.01651419233021 | 6.52481519429714 |
| H | 1.68669031191974  | -1.72210444311625 | 6.17058482207778 |
| H | 1.63192700689515  | 0.46249576793108  | 5.64805245728675 |



#### 4-4. Cartesian coordinates of the calculated 6-TS

The DFT-optimised transition state geometry was calculated at the BP86-D4/def2-SVP

CPCM(THF) level of theory.

FINAL SINGLE POINT ENERGY -6097.888273406011 a.u.

|    |              |              |              |
|----|--------------|--------------|--------------|
| Mo | 1.664950000  | 0.044518000  | -0.569832000 |
| Mo | -0.993355000 | 1.104211000  | -0.497644000 |
| Fe | 0.520800000  | 2.244048000  | -1.943115000 |
| P  | 0.491225000  | 0.139379000  | -2.637352000 |
| P  | -0.551704000 | -1.175704000 | -1.128835000 |
| P  | 0.564106000  | -1.345344000 | 1.072041000  |
| P  | 0.375122000  | 0.998390000  | 1.495547000  |
| P  | 1.496824000  | 2.323573000  | 0.044344000  |
| N  | -2.917624000 | 0.638095000  | -1.082660000 |
| B  | -3.473199000 | 1.472166000  | -0.031715000 |
| N  | -2.367930000 | 2.123896000  | 0.647193000  |
| N  | 3.116763000  | -1.222159000 | -0.036609000 |
| B  | 3.146094000  | -2.286237000 | 0.928776000  |
| N  | 1.857746000  | -2.403425000 | 1.602985000  |
| C  | 4.025725000  | -0.634787000 | -0.931186000 |
| C  | 4.060422000  | -1.090696000 | -2.299202000 |
| C  | 4.855756000  | 0.454741000  | -0.482160000 |
| C  | -2.949245000 | 0.199950000  | -5.454321000 |
| C  | -0.420432000 | 2.375321000  | -5.146235000 |
| C  | 2.641667000  | 1.938351000  | -4.496536000 |
| C  | 2.786774000  | -2.124985000 | -4.255293000 |
| C  | -3.799695000 | -1.881311000 | -3.681702000 |
| C  | -3.126344000 | 0.555402000  | -3.972256000 |
| C  | -4.207667000 | 1.645421000  | -3.820292000 |
| C  | 0.282998000  | 2.934285000  | -3.953974000 |
| C  | -4.169149000 | -2.983962000 | -2.900177000 |
| C  | 1.690554000  | 2.755462000  | -3.681247000 |
| C  | -3.442839000 | -0.651249000 | -3.098322000 |
| C  | 4.976850000  | -0.475327000 | -3.168198000 |
| C  | 5.815032000  | 0.559386000  | -2.727619000 |

|   |              |              |              |
|---|--------------|--------------|--------------|
| C | -1.638592000 | 4.451755000  | -3.049567000 |
| C | -0.252582000 | 3.886788000  | -3.013439000 |
| C | 3.180827000  | -2.245199000 | -2.776230000 |
| C | 3.833541000  | -3.616122000 | -2.505405000 |
| C | 2.041186000  | 3.625050000  | -2.600799000 |
| C | -4.218559000 | -2.845239000 | -1.510166000 |
| C | -3.431017000 | -0.530613000 | -1.670345000 |
| C | 0.845767000  | 4.332496000  | -2.189222000 |
| C | 3.429944000  | 3.877555000  | -2.101419000 |
| C | 5.742790000  | 1.027952000  | -1.407350000 |
| C | -3.872878000 | -1.637951000 | -0.873570000 |
| C | 0.831675000  | 5.447422000  | -1.194390000 |
| C | -5.977984000 | 1.161822000  | -0.662377000 |
| C | -7.355820000 | 1.346486000  | -0.464019000 |
| C | -4.001655000 | -1.585591000 | 0.643357000  |
| C | -5.017213000 | 1.673840000  | 0.245051000  |
| C | -7.814791000 | 2.047044000  | 0.664851000  |
| C | -5.455287000 | -1.854094000 | 1.080026000  |
| C | -3.795197000 | 5.019740000  | -0.061243000 |
| C | 5.566271000  | -3.083512000 | 0.403071000  |
| C | 6.703070000  | -3.873671000 | 0.624072000  |
| C | -3.031644000 | -2.549939000 | 1.348110000  |
| C | 2.036468000  | -6.167588000 | 0.016254000  |
| C | 4.828886000  | 0.913599000  | 0.971554000  |
| C | -6.883835000 | 2.568335000  | 1.581140000  |
| C | -5.508426000 | 2.388177000  | 1.367371000  |
| C | -2.391246000 | 5.026901000  | 0.576569000  |
| C | 5.007660000  | 2.429972000  | 1.132109000  |
| C | -0.243953000 | -5.047283000 | -0.226577000 |
| C | 4.401562000  | -3.196713000 | 1.208450000  |
| C | 1.170684000  | -4.948429000 | 0.376934000  |
| C | -1.903320000 | 6.477173000  | 0.713127000  |
| C | 5.878929000  | 0.151888000  | 1.807193000  |
| C | 6.715421000  | -4.808505000 | 1.673929000  |
| C | -2.362961000 | 2.815644000  | 1.873408000  |
| C | 4.449340000  | -4.142645000 | 2.265418000  |
| C | -2.350253000 | 4.246779000  | 1.883169000  |
| C | 5.583982000  | -4.935382000 | 2.497421000  |

|   |              |              |              |
|---|--------------|--------------|--------------|
| C | 1.102635000  | -4.718803000 | 1.882678000  |
| C | 1.435059000  | -3.466953000 | 2.461417000  |
| C | -2.513321000 | 0.591236000  | 3.207805000  |
| C | -2.383452000 | 2.107551000  | 3.118274000  |
| C | -3.946078000 | 0.199491000  | 3.620752000  |
| C | -2.345118000 | 4.927522000  | 3.115227000  |
| C | 0.696917000  | -5.757290000 | 2.743358000  |
| C | -1.507465000 | -0.041172000 | 4.183660000  |
| C | 1.338500000  | -3.231068000 | 3.860451000  |
| C | 1.685163000  | -1.861202000 | 4.438629000  |
| C | -2.367176000 | 2.837729000  | 4.322990000  |
| C | 3.203441000  | -1.592644000 | 4.426690000  |
| C | -2.347371000 | 4.235792000  | 4.333860000  |
| C | 0.619859000  | -5.556205000 | 4.127442000  |
| C | 0.932472000  | -4.302658000 | 4.677808000  |
| C | 1.118001000  | -1.628051000 | 5.845435000  |
| H | -3.880886000 | -0.223802000 | -5.883965000 |
| H | -2.712187000 | 1.105293000  | -6.045466000 |
| H | -2.134078000 | -0.535099000 | -5.613965000 |
| H | -0.039502000 | 2.872328000  | -6.064865000 |
| H | -3.795983000 | -1.985272000 | -4.775111000 |
| H | 3.059776000  | 2.551752000  | -5.324491000 |
| H | -0.251495000 | 1.287494000  | -5.266058000 |
| H | -1.507251000 | 2.555661000  | -5.095742000 |
| H | 3.653353000  | -2.282268000 | -4.930643000 |
| H | 2.145645000  | 1.060988000  | -4.955368000 |
| H | 2.344422000  | -1.134034000 | -4.477928000 |
| H | 2.031043000  | -2.896850000 | -4.504117000 |
| H | -4.433742000 | -3.940595000 | -3.377009000 |
| H | -3.991459000 | 2.507468000  | -4.485611000 |
| H | -5.207849000 | 1.251228000  | -4.098540000 |
| H | 5.037033000  | -0.806187000 | -4.214621000 |
| H | 3.489174000  | 1.571662000  | -3.888940000 |
| H | -1.712870000 | 5.253755000  | -3.816726000 |
| H | -2.172486000 | 0.985430000  | -3.591442000 |
| H | 6.524741000  | 1.021230000  | -3.431164000 |
| H | -2.389051000 | 3.679592000  | -3.298909000 |
| H | 4.825128000  | -3.688540000 | -2.999427000 |

|   |              |              |              |
|---|--------------|--------------|--------------|
| H | -4.259308000 | 2.020942000  | -2.781300000 |
| H | 3.189210000  | -4.423922000 | -2.908567000 |
| H | 3.954316000  | 4.583364000  | -2.781833000 |
| H | 2.244011000  | -2.215455000 | -2.179109000 |
| H | 4.029486000  | 2.948500000  | -2.057119000 |
| H | -4.536870000 | -3.700486000 | -0.893212000 |
| H | -1.922149000 | 4.894216000  | -2.079524000 |
| H | -5.640311000 | 0.601028000  | -1.545003000 |
| H | 3.975746000  | -3.806405000 | -1.426615000 |
| H | -8.075183000 | 0.937325000  | -1.190903000 |
| H | 6.396807000  | 1.854264000  | -1.092555000 |
| H | 1.226073000  | 6.375061000  | -1.663257000 |
| H | 3.429718000  | 4.331852000  | -1.092351000 |
| H | -0.187308000 | 5.662085000  | -0.838473000 |
| H | -3.808382000 | 5.642200000  | -0.980287000 |
| H | 5.592571000  | -2.355936000 | -0.419380000 |
| H | -5.779334000 | -2.877559000 | 0.797744000  |
| H | -6.155173000 | -1.133036000 | 0.614695000  |
| H | 7.585108000  | -3.757357000 | -0.024625000 |
| H | -4.117906000 | 3.999951000  | -0.335948000 |
| H | 2.127954000  | -6.262323000 | -1.085235000 |
| H | 1.463150000  | 5.226877000  | -0.310849000 |
| H | -8.894671000 | 2.190226000  | 0.828770000  |
| H | -3.207023000 | -3.600481000 | 1.036040000  |
| H | -0.191325000 | -5.174172000 | -1.327733000 |
| H | -1.713012000 | 4.481510000  | -0.117739000 |
| H | -1.838358000 | 6.954295000  | -0.286095000 |
| H | -3.744200000 | -0.560041000 | 0.973260000  |
| H | -1.976478000 | -2.296880000 | 1.128419000  |
| H | 6.023979000  | 2.766514000  | 0.839595000  |
| H | 1.653662000  | -4.061869000 | -0.080204000 |
| H | 4.265889000  | 2.986973000  | 0.527633000  |
| H | -4.547437000 | 5.437297000  | 0.640278000  |
| H | 6.903561000  | 0.356460000  | 1.431341000  |
| H | 3.057369000  | -6.070796000 | 0.438275000  |
| H | -5.554712000 | -1.765990000 | 2.180350000  |
| H | 5.718011000  | -0.941209000 | 1.778474000  |
| H | 1.596580000  | -7.113291000 | 0.396384000  |

|   |              |              |              |
|---|--------------|--------------|--------------|
| H | 7.605626000  | -5.431992000 | 1.852192000  |
| H | 3.829499000  | 0.650686000  | 1.376933000  |
| H | -0.832602000 | -4.131391000 | -0.019135000 |
| H | -3.162555000 | -2.503699000 | 2.448691000  |
| H | -7.232762000 | 3.122978000  | 2.466554000  |
| H | -4.800792000 | 2.819756000  | 2.088787000  |
| H | -0.906483000 | 6.543367000  | 1.193423000  |
| H | -0.799697000 | -5.912445000 | 0.192329000  |
| H | -2.609850000 | 7.088971000  | 1.311721000  |
| H | -2.310287000 | 0.176258000  | 2.200091000  |
| H | 4.861214000  | 2.713634000  | 2.193927000  |
| H | 5.830290000  | 0.477718000  | 2.866434000  |
| H | -4.697638000 | 0.532505000  | 2.881284000  |
| H | 3.586159000  | -4.261288000 | 2.931701000  |
| H | 5.583686000  | -5.657418000 | 3.328826000  |
| H | -4.034753000 | -0.900296000 | 3.730041000  |
| H | 1.218253000  | -1.107801000 | 3.765656000  |
| H | -1.518044000 | -1.145580000 | 4.084108000  |
| H | -2.342016000 | 6.026704000  | 3.127247000  |
| H | 3.627712000  | -1.633122000 | 3.406385000  |
| H | 0.436006000  | -6.739947000 | 2.320389000  |
| H | -0.474303000 | 0.306503000  | 3.987558000  |
| H | -4.205154000 | 0.656592000  | 4.598611000  |
| H | 3.416877000  | -0.585115000 | 4.838947000  |
| H | -1.751040000 | 0.199908000  | 5.239262000  |
| H | -2.386238000 | 2.290634000  | 5.278562000  |
| H | 3.741510000  | -2.339193000 | 5.047393000  |
| H | 1.273395000  | -0.571756000 | 6.144080000  |
| H | 0.031562000  | -1.838797000 | 5.896354000  |
| H | -2.338788000 | 4.787378000  | 5.286901000  |
| H | 0.303876000  | -6.379885000 | 4.786460000  |
| H | 0.853341000  | -4.159562000 | 5.764846000  |
| H | 1.625380000  | -2.261891000 | 6.602859000  |

## 5. Reference

1. D. -Y. Lu, T. -S. Kuo, and Y. -C. Tsai, *Angew. Chem. Int. Ed.*, 2016, **55**, 11614–11618.
2. O. J. Scherer and T. Brück, *Angew. Chemie Int. Ed. English*, 1987, **26**, 59.

3. M. Fleischmann, S. Welsch, H. Krauss, M. Schmidt, M. Bodensteiner, E. VPeresykina, M. Sierka, C. Gröger, and M. Scheer, *Chem. – A Eur. J.*, 2014, **20**, 3759–3768.
4. H. E. Gottlieb, V. Kotlyar, and A. Nudelman, *J. Org. Chem.*, 1997, **62**, 7512–7515.
5. O. VDolomanov, L. J. Bourhis, R. J. Gildea, J. A. K. Howard, and H. Puschmann, *J. Appl. Crystallogr.*, 2009, **42**, 339–341.
6. G. M. Sheldrick, *Acta Crystallogr. Sect. A*, 2015, **71**, 3–8.
7. G. M. Sheldrick, *Acta Crystallogr. Sect. C*, 2015, **71**, 3–8.
8. F. Neese, *WIREs Comput. Mol. Sci.*, 2022, **12**, e1606.
9. S. H. Vosko, L. Wilk, and M. Nusair, *Can. J. Phys.*, 1980, **58**, 1200–1211.
10. J. P. Perdew, *Phys. Rev. B*, 1986, **33**, 8822–8824.
11. A. D. Becke, *Phys. Rev. A*, 1988, **38**, 3098–3100.
12. F. Weigend, *Phys. Chem. Chem. Phys.*, 2006, **8**, 1057–1065.
13. F. Weigend and R. Ahlrichs, *Phys. Chem. Chem. Phys.*, 2005, **7**, 3297–3305.
14. E. Caldeweyher, C. Bannwarth, and S. Grimme, *J. Chem. Phys.*, 2017, **147**.
15. E. Caldeweyher, S. Ehlert, A. Hansen, H. Neugebauer, S. Spicher, C. Bannwarth, and S. Grimme, *J. Chem. Phys.*, 2019, **150**.
16. E. D. Glendenning, C. R. Landis, and F. Weinhold, *J. Comput. Chem.*, 2019, **40**, 2234–2241.
17. G. Knizia, *J. Chem. Theory Comput.*, 2013, **9**, 4834–4843.
